# Supplementary material
Source: publisher figshare collection journal article supplement (https://gsajournals.figshare.com/ndownloader/files/18131306)
Supplement: Supplementary file 1 [file 18131306]

**Figure 3 raw images.**

Note: each panel was cropped to generate the corresponding panel in Fig. 3.


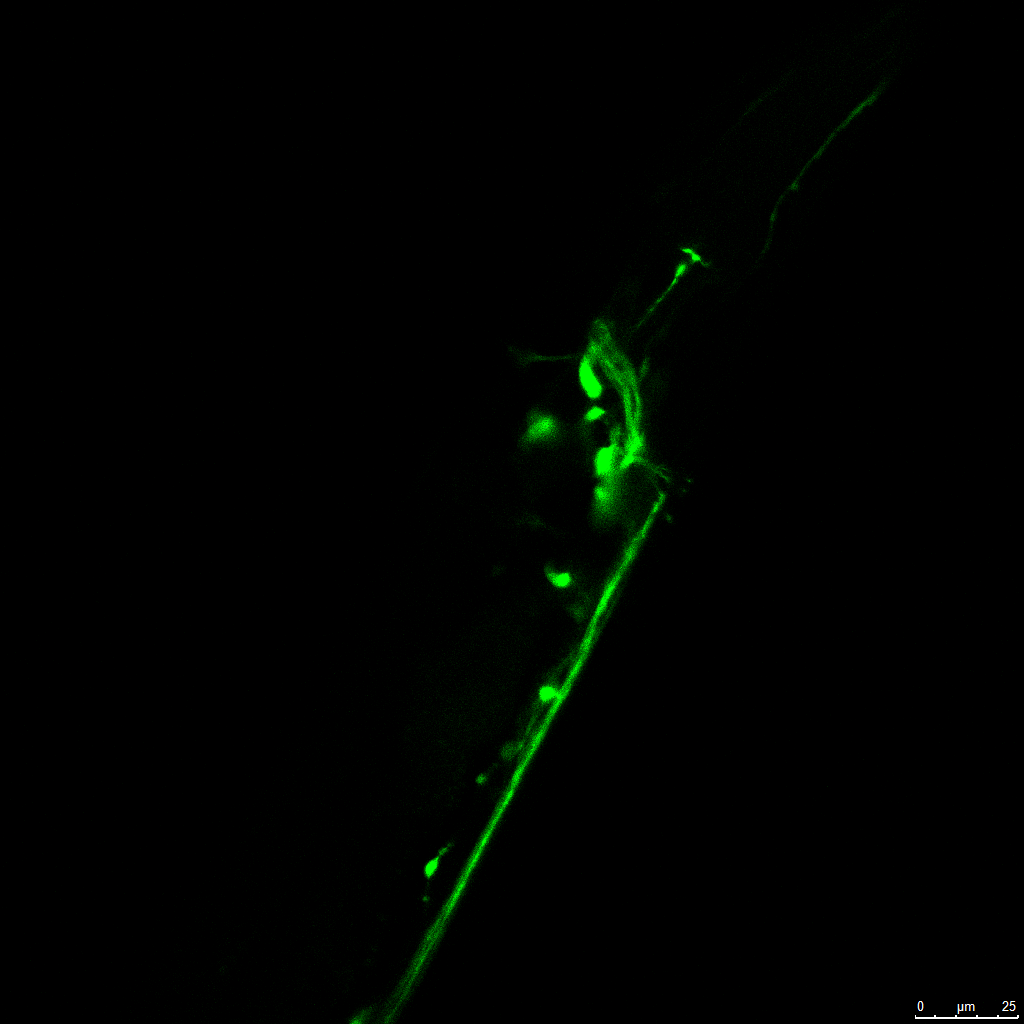

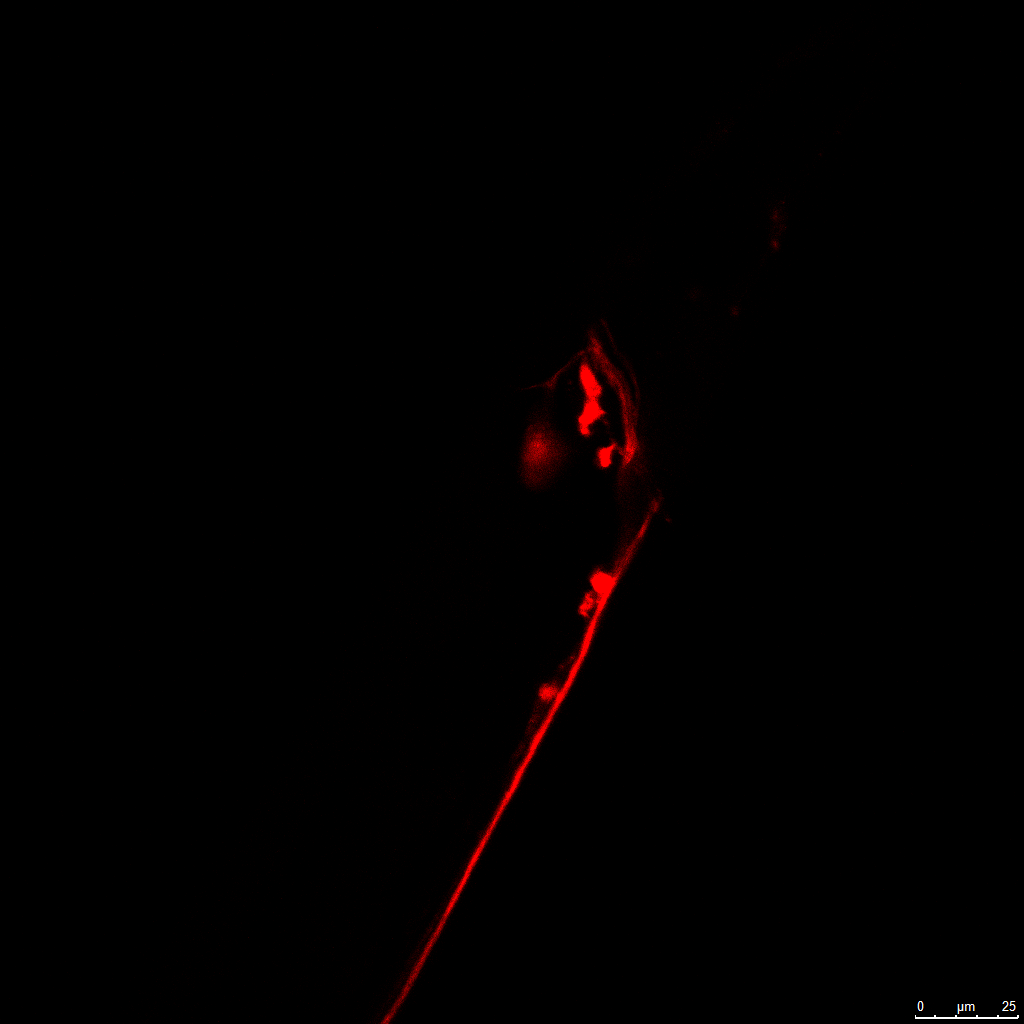

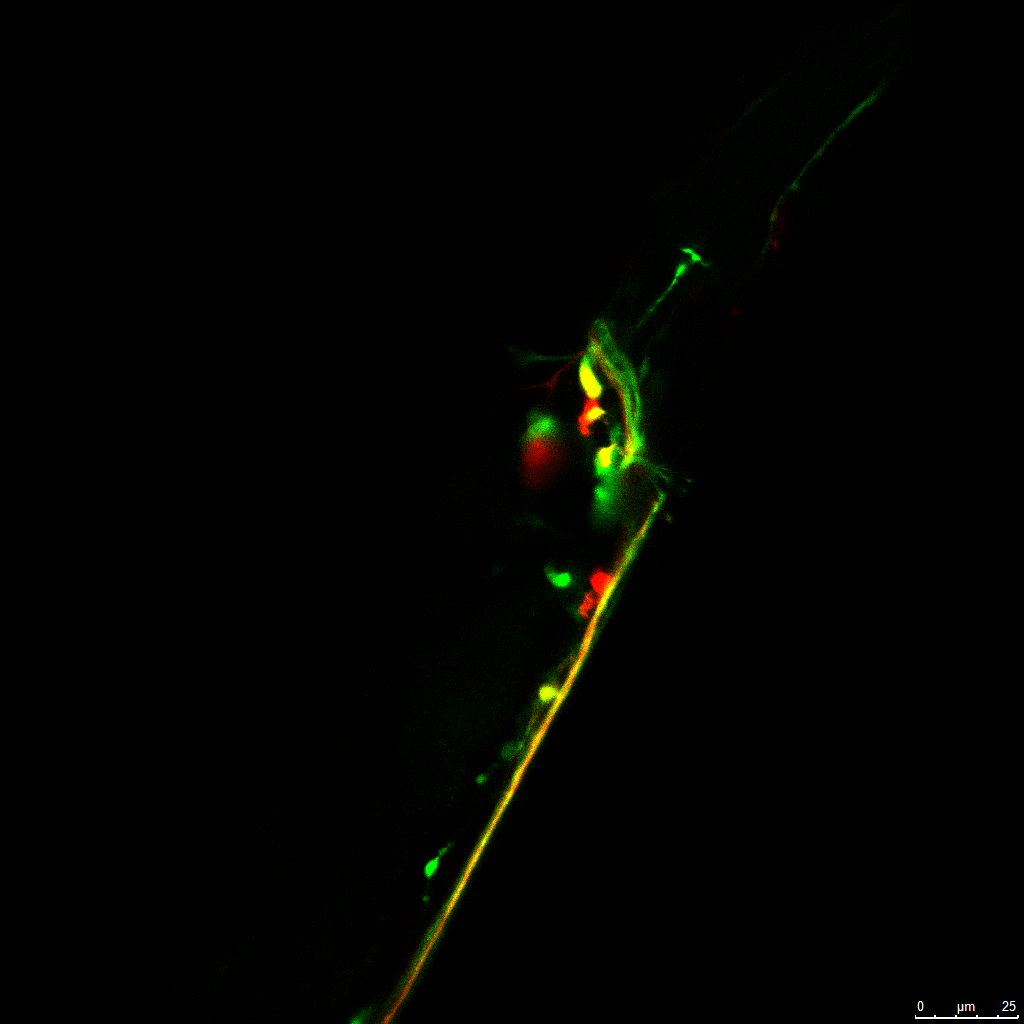


Merged

*Pnmr-1::mCherry*

*Punc-80::GFP*

A


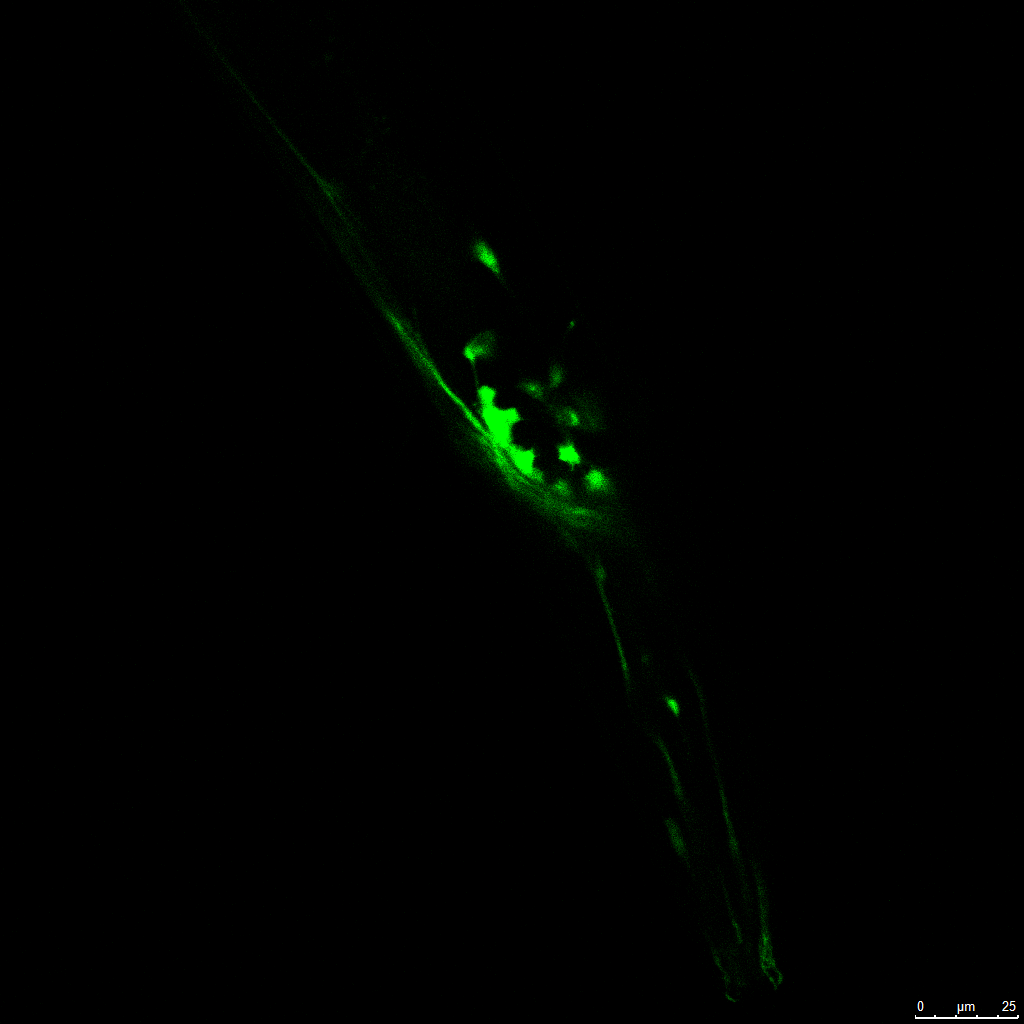

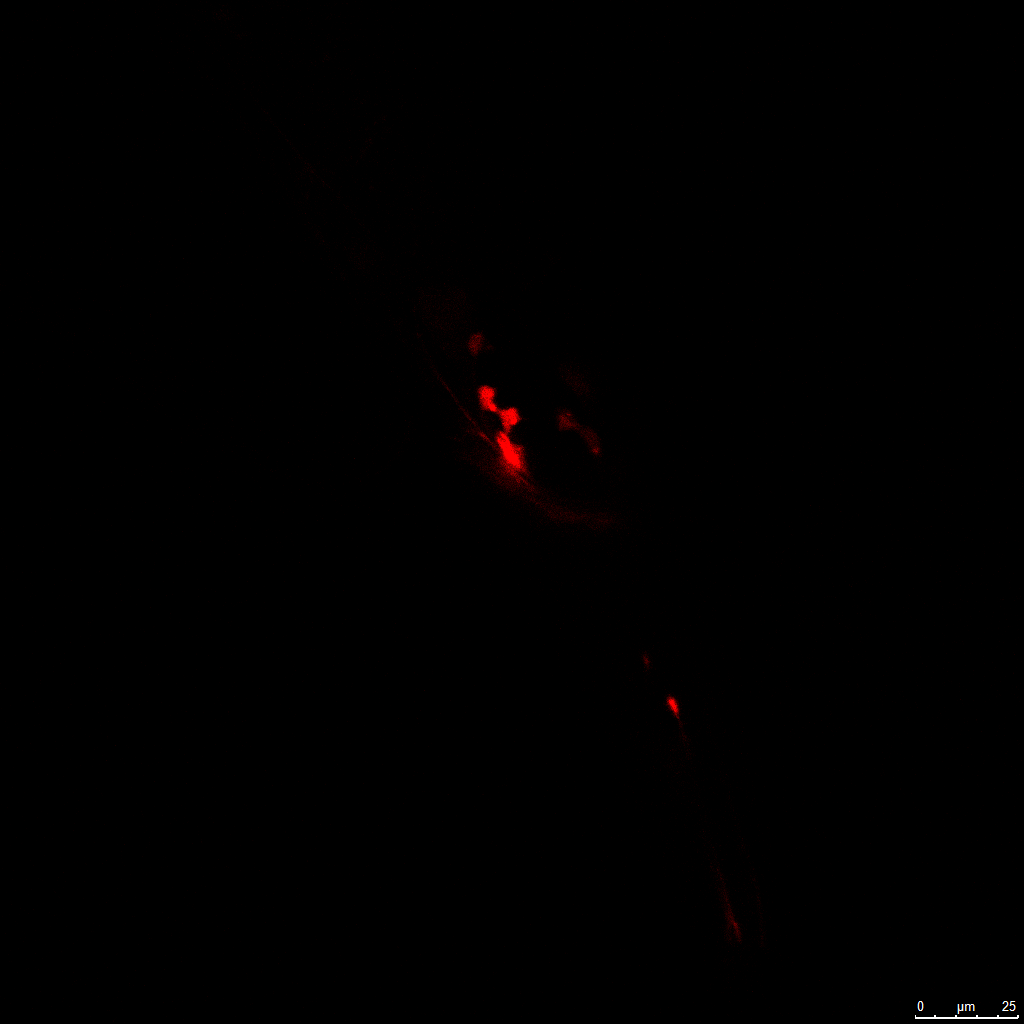

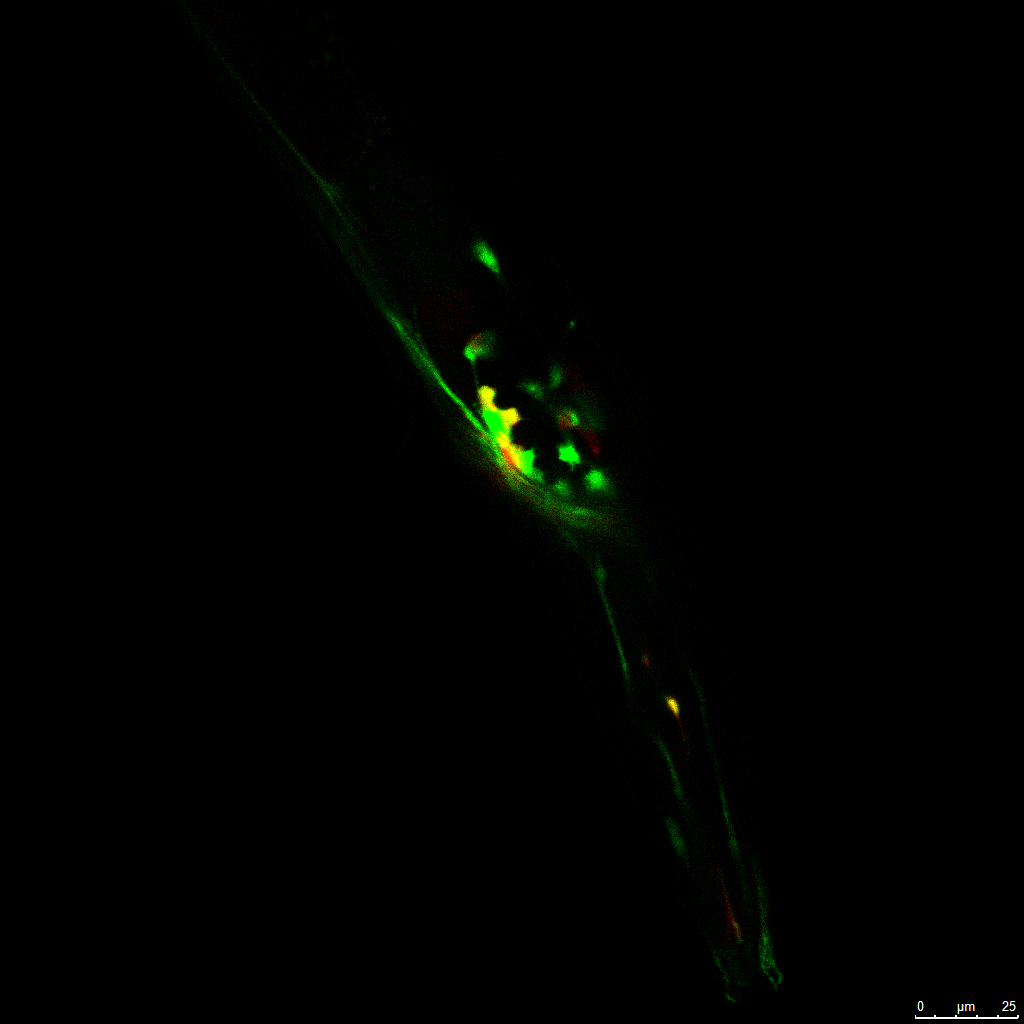


Merged

*Pmgl-1::mCherry*

*Punc-80::GFP*

B


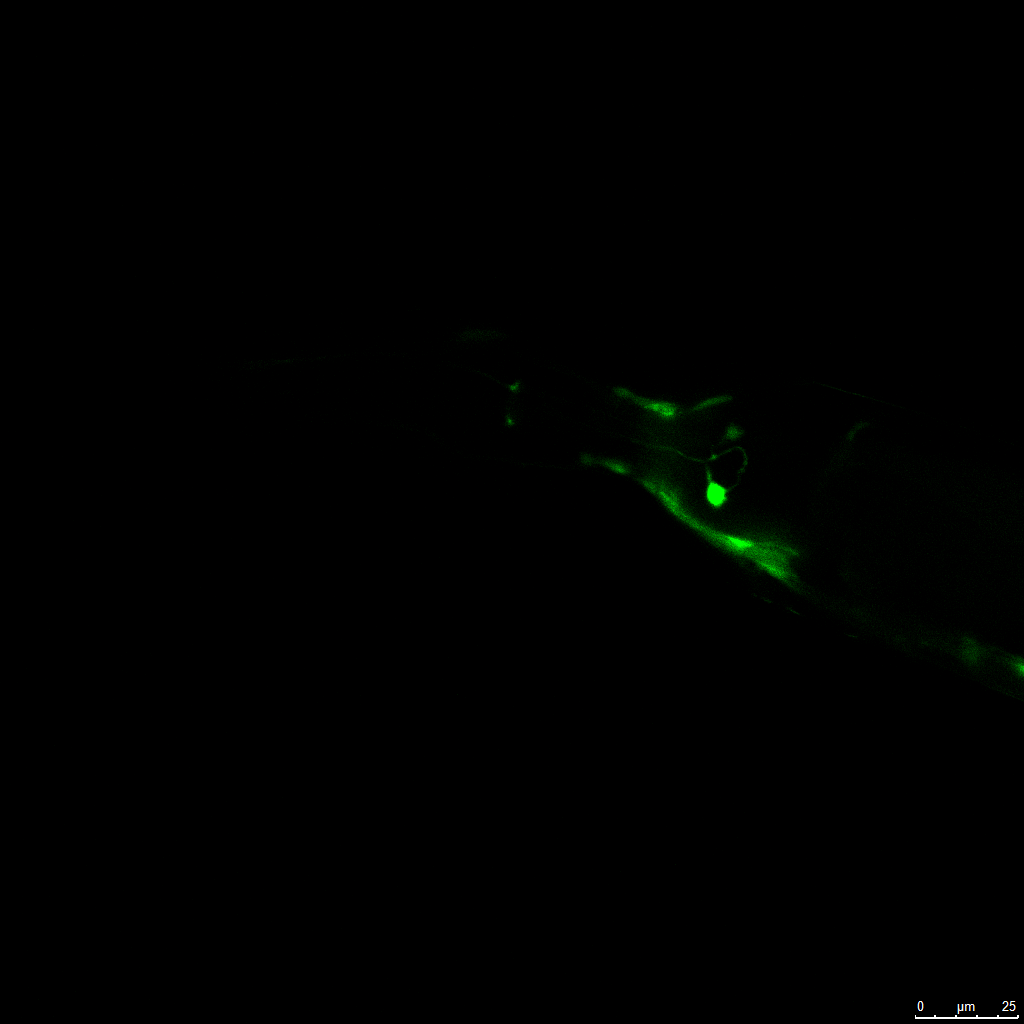

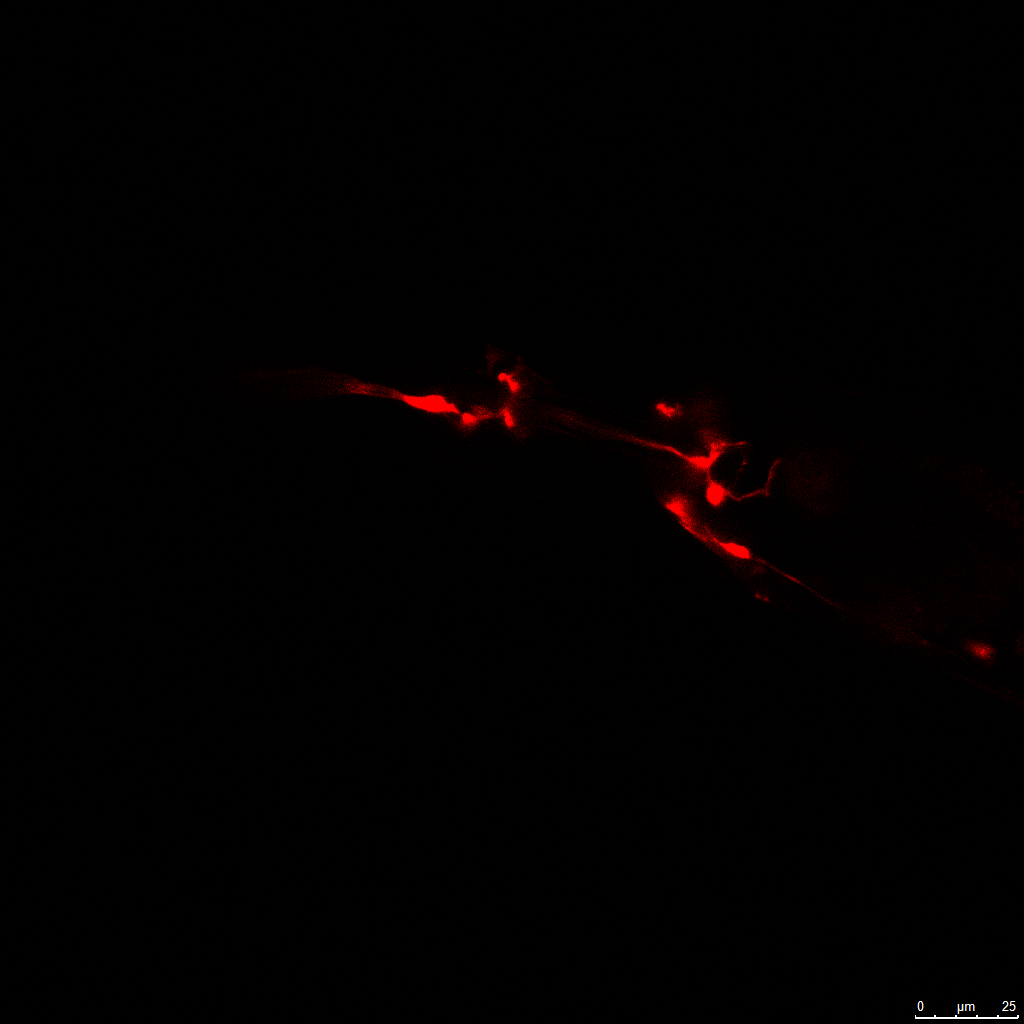

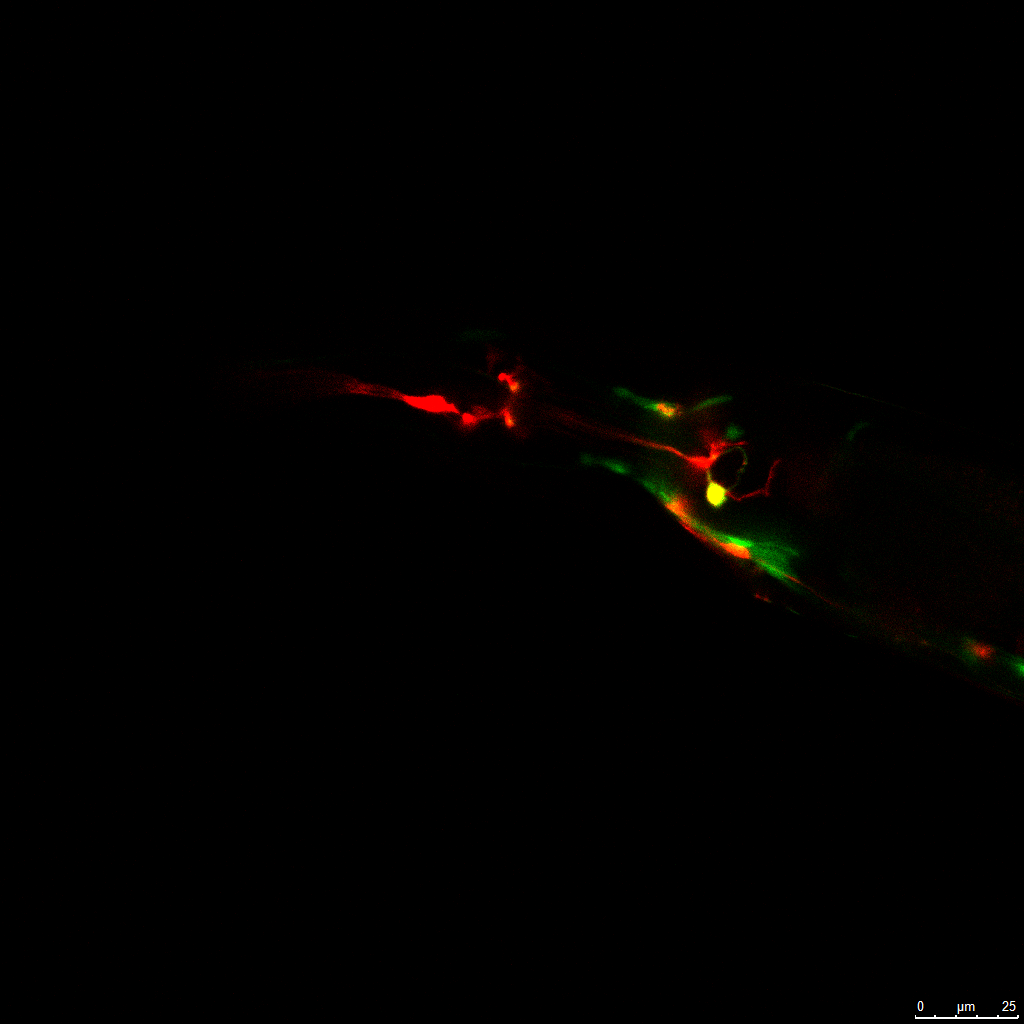


Merged

*Pmgl-1::mCherry*

*Punc-80::GFP*

C


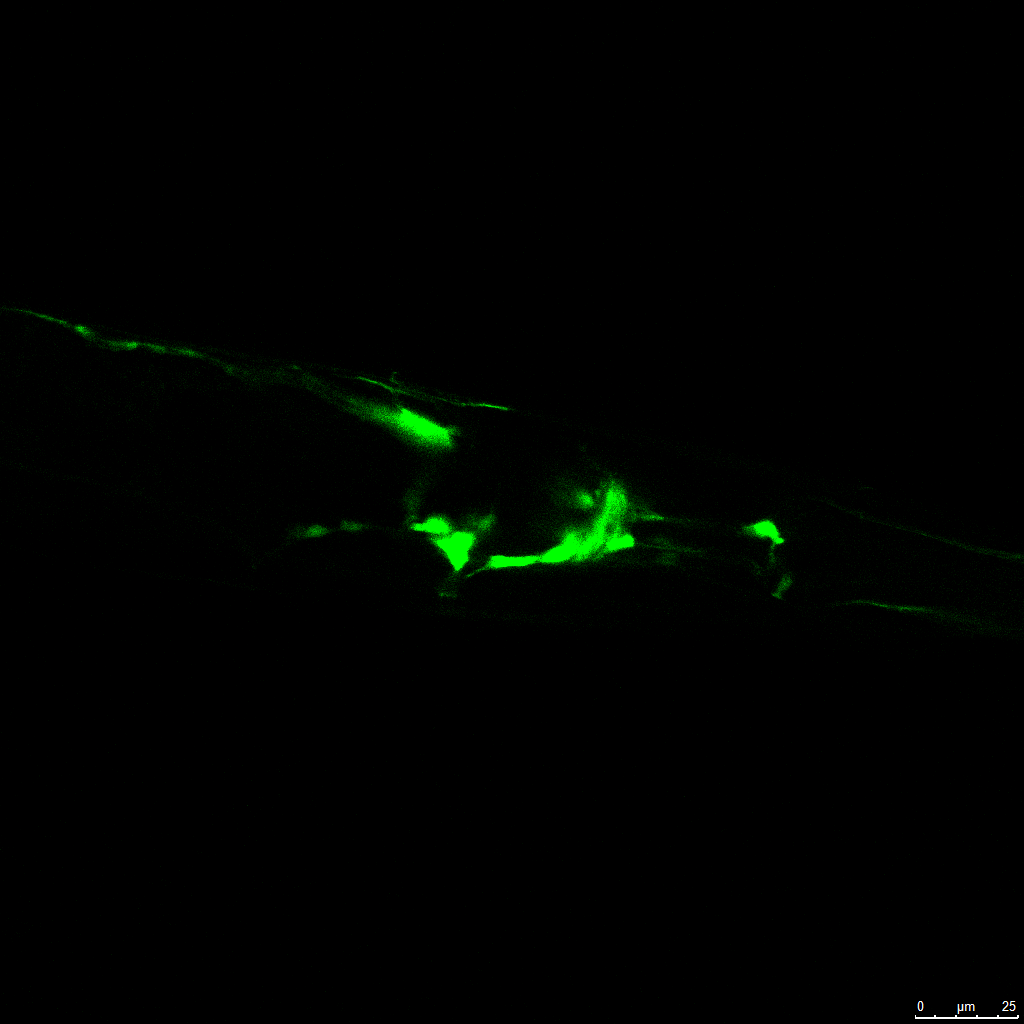

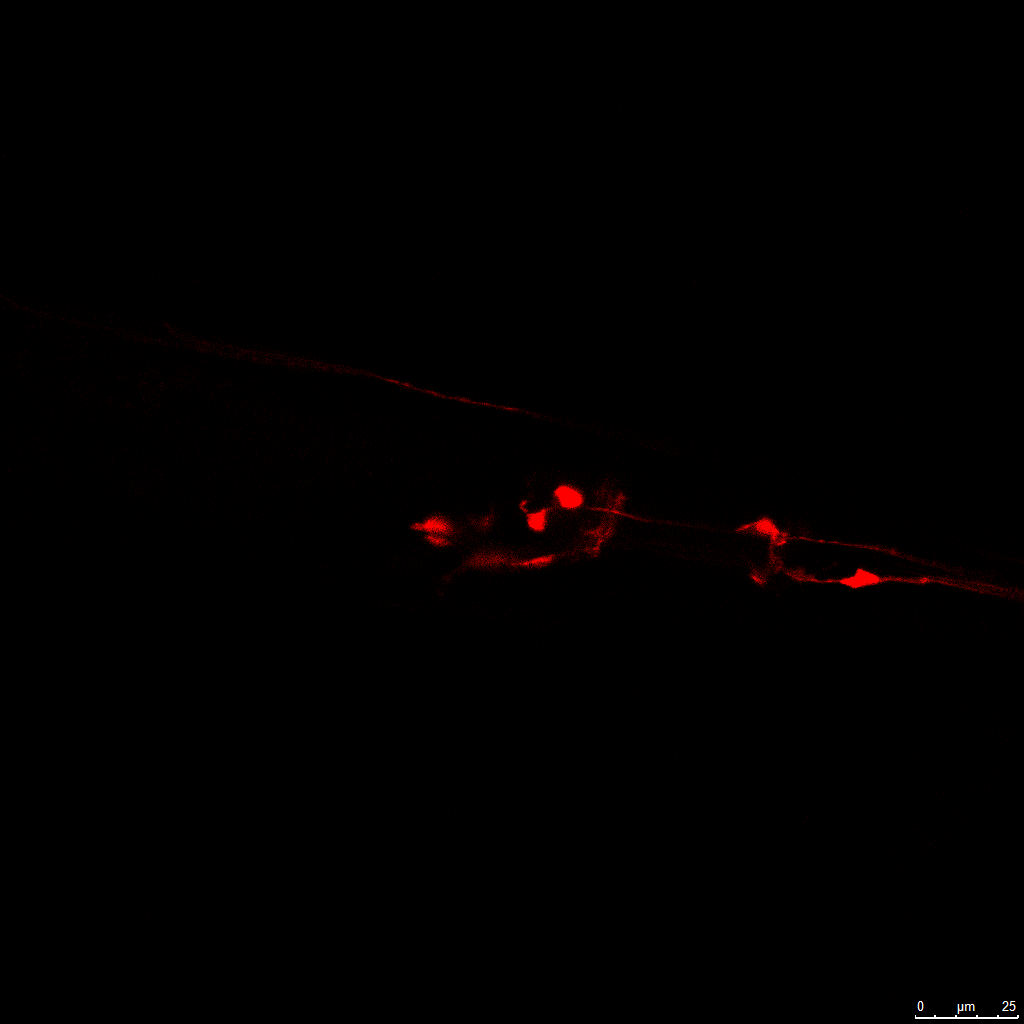

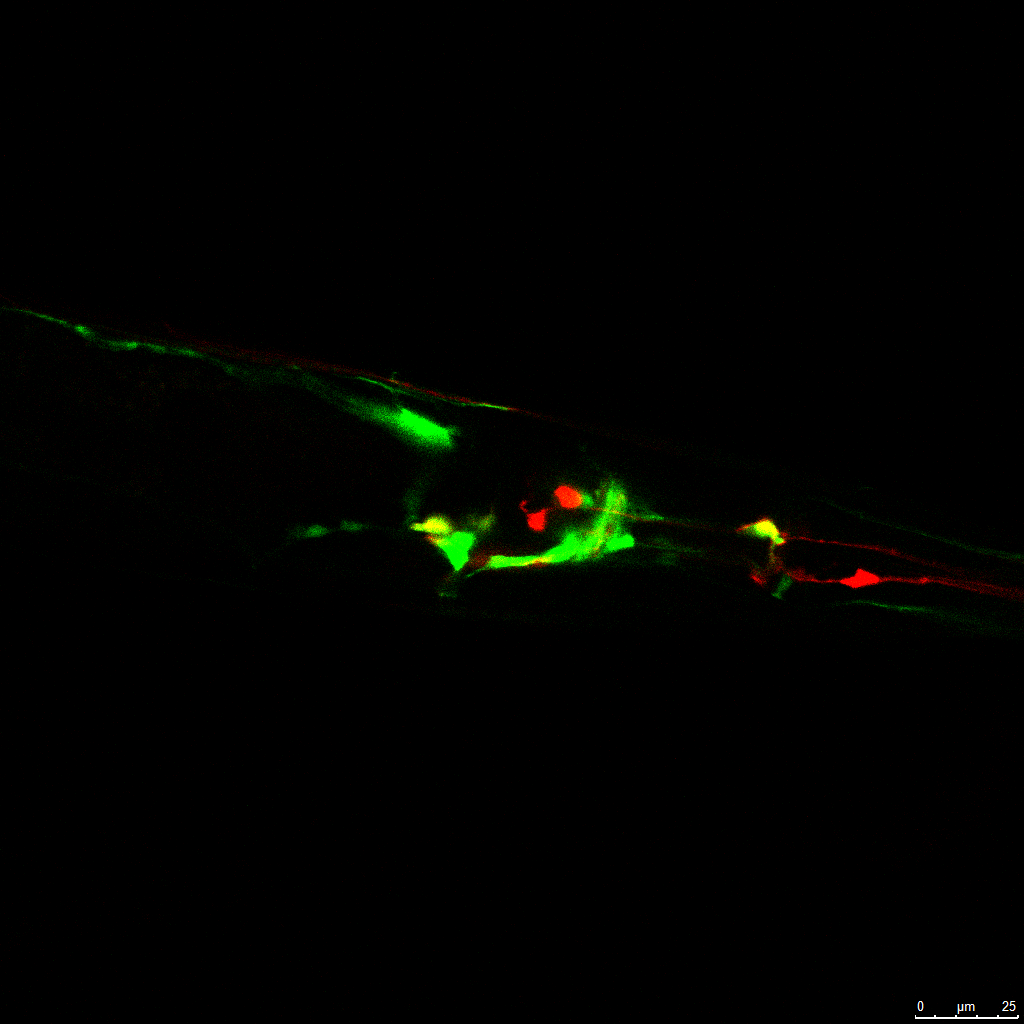


Merged

*Pmgl-1::mCherry*

*Punc-80::GFP*

D

**Figure 5 raw images.**

Note: each panel was cropped to generate the corresponding panel in Fig. 5.


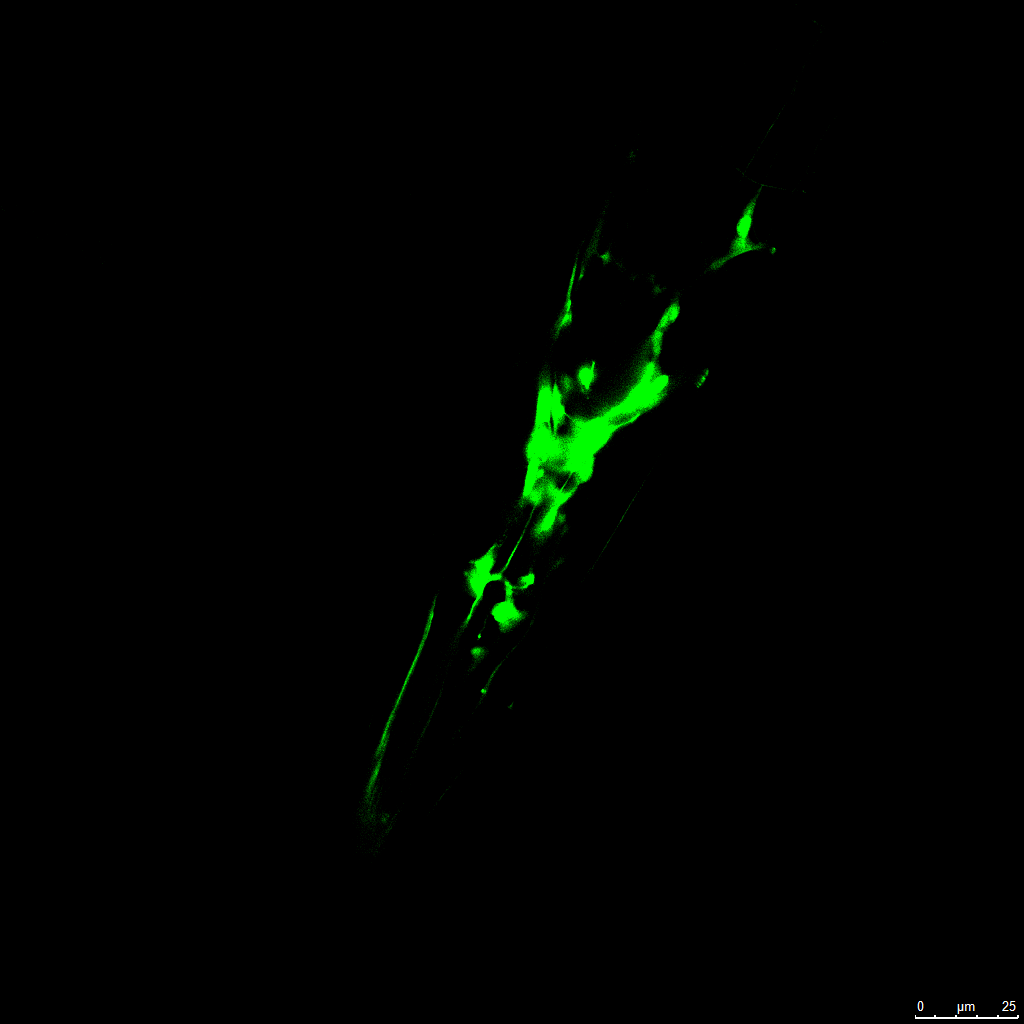

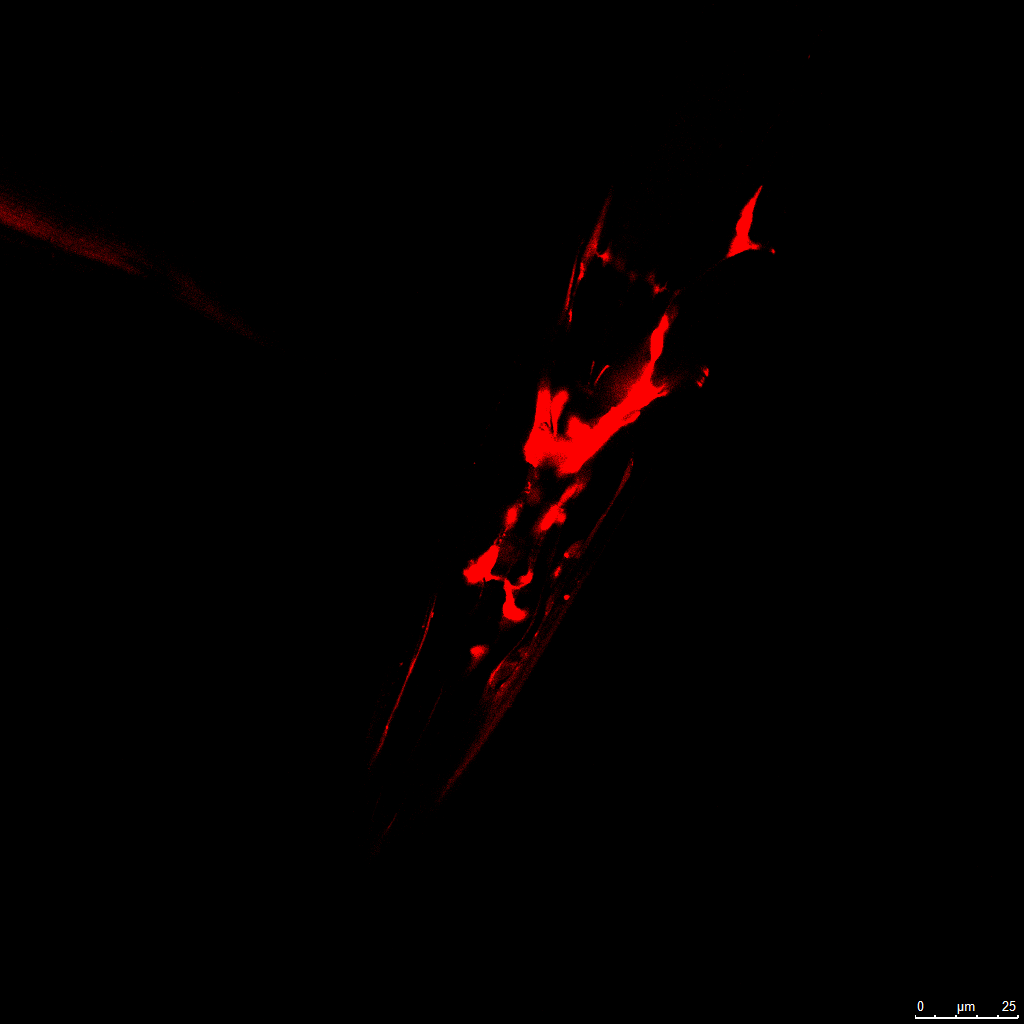

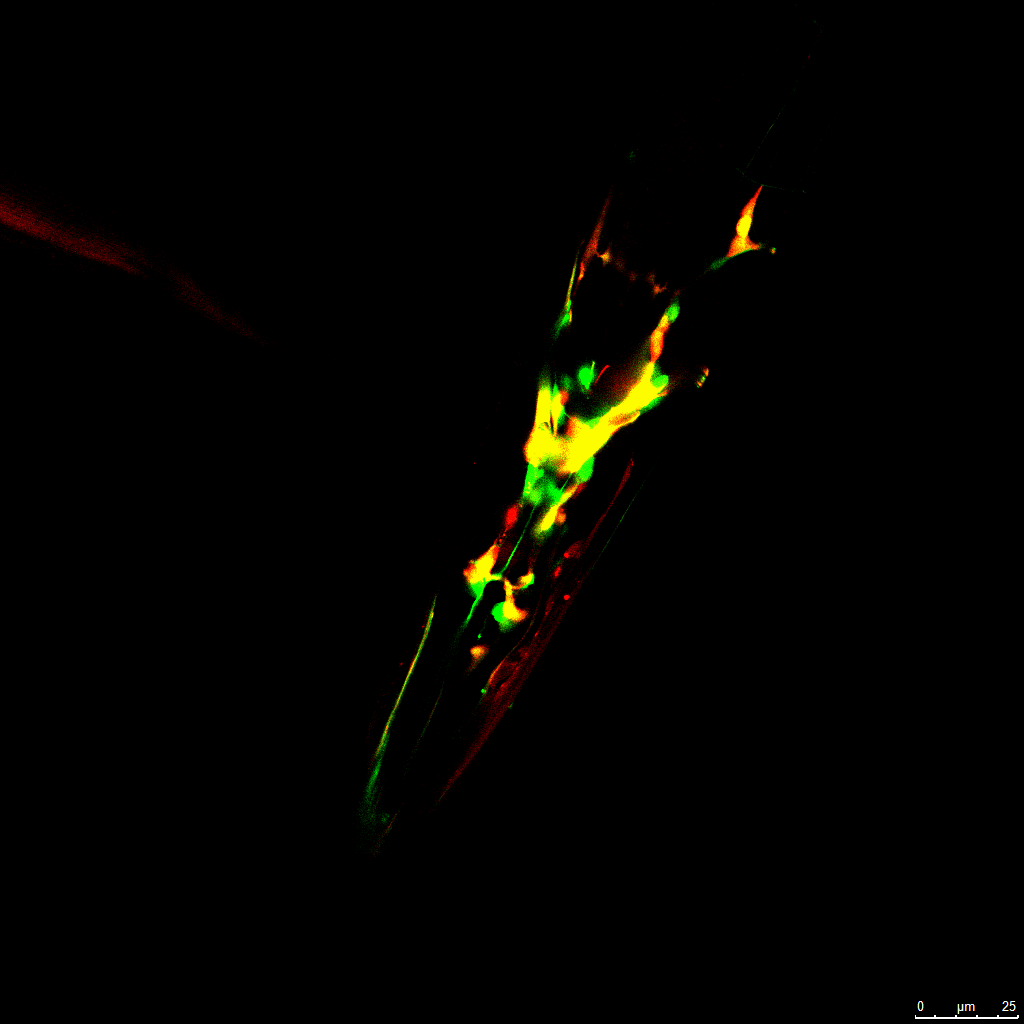


*Punc-80::mCherry*

*PLunc-79a::GFP*

Merged

A


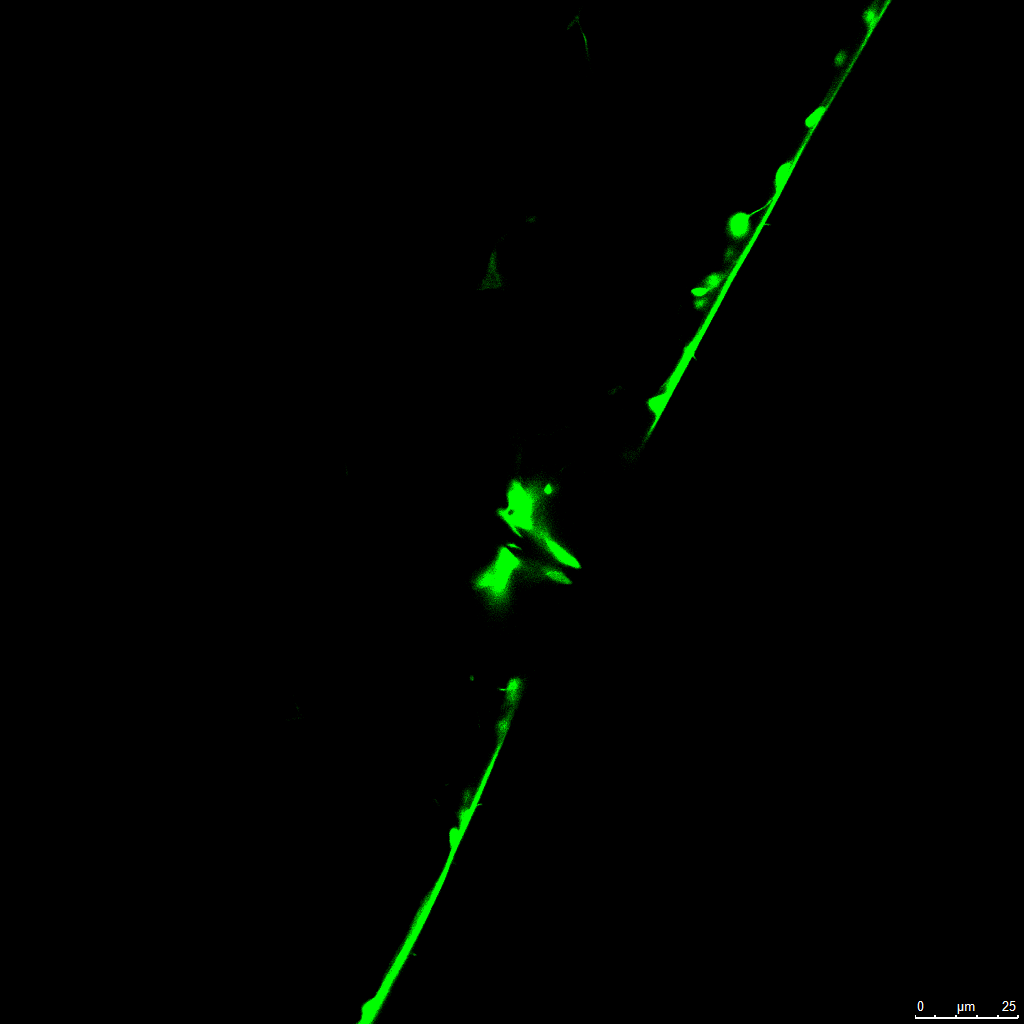

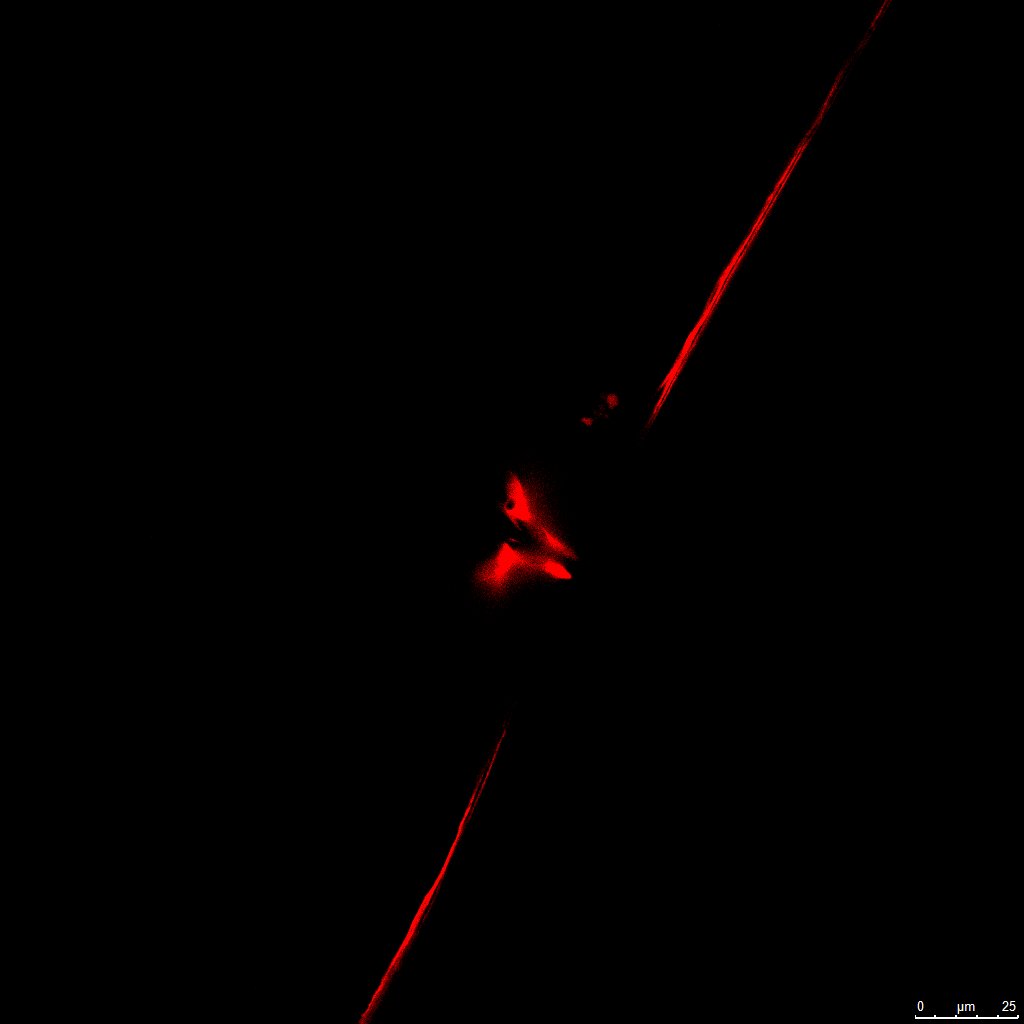

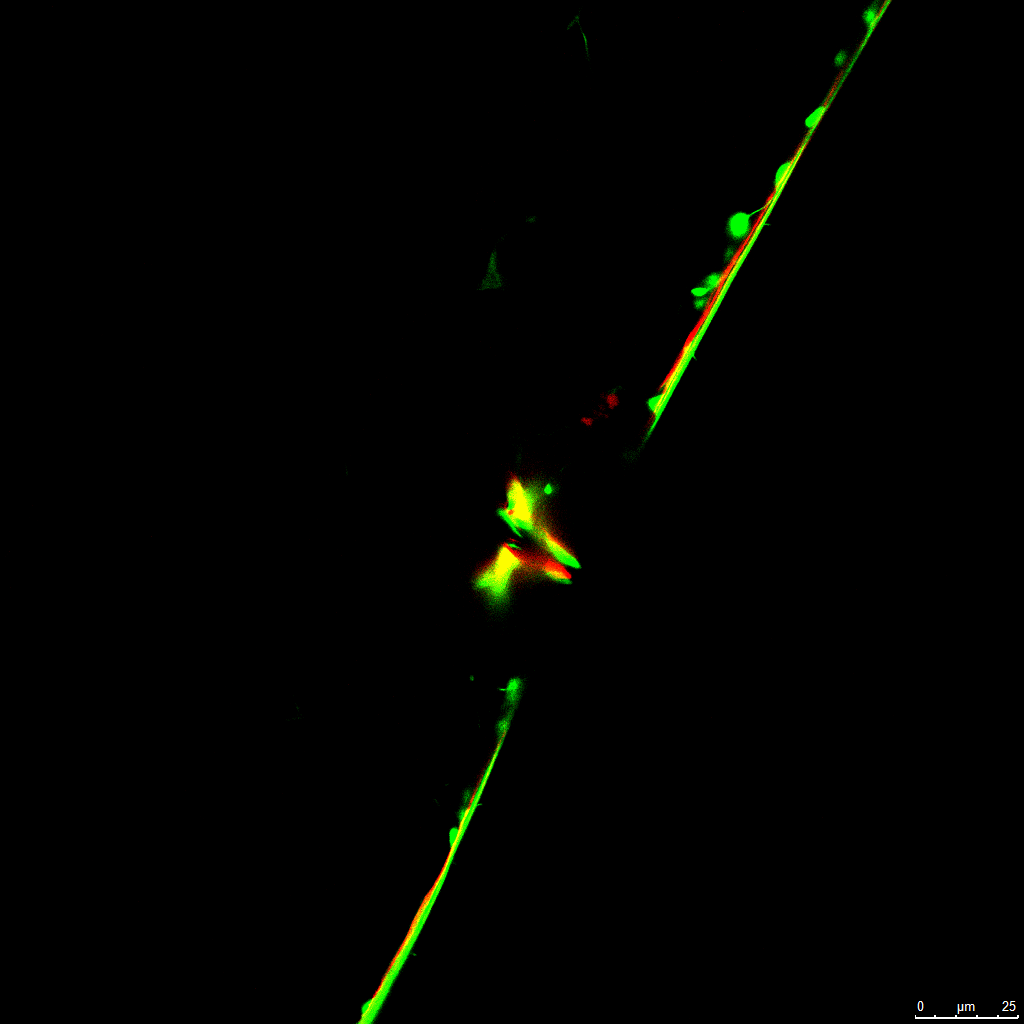


Merged

*Punc-80::mCherry*

*PLunc-79a::GFP*

B


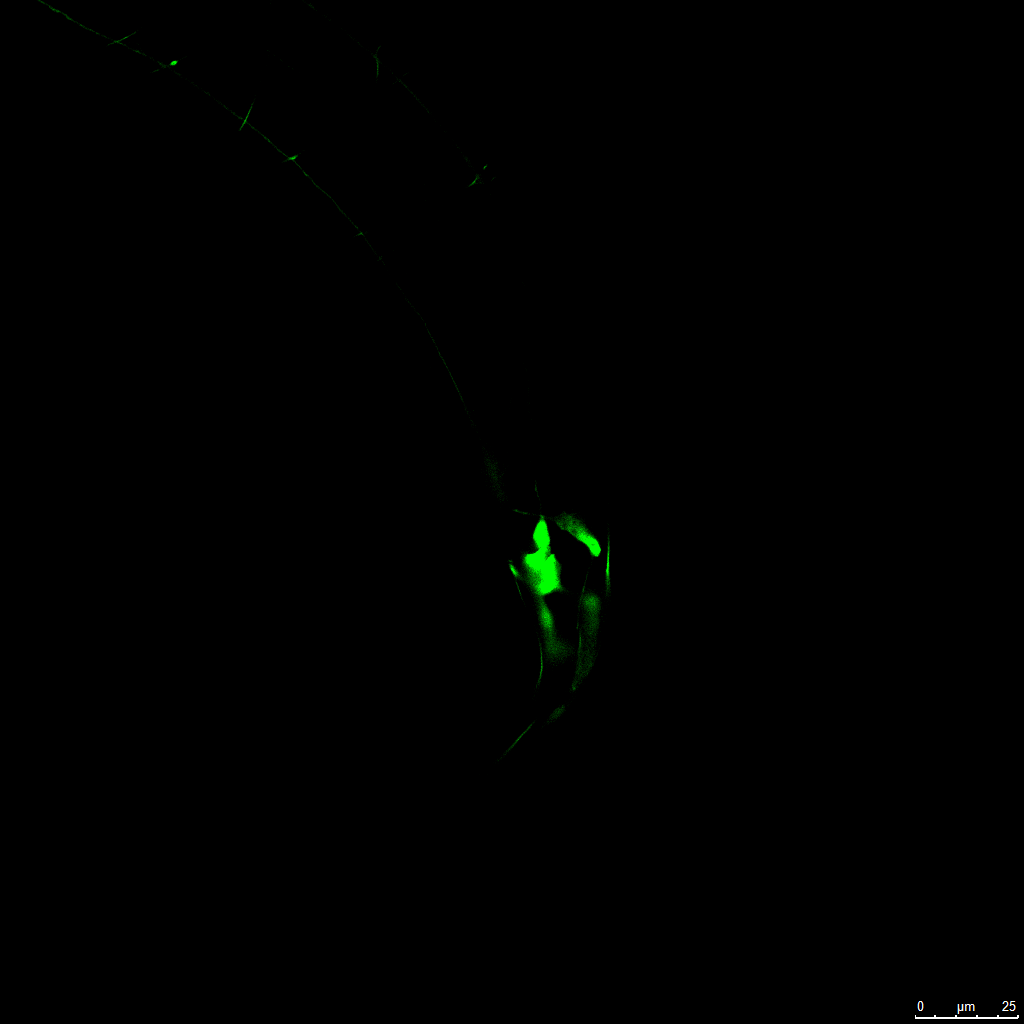

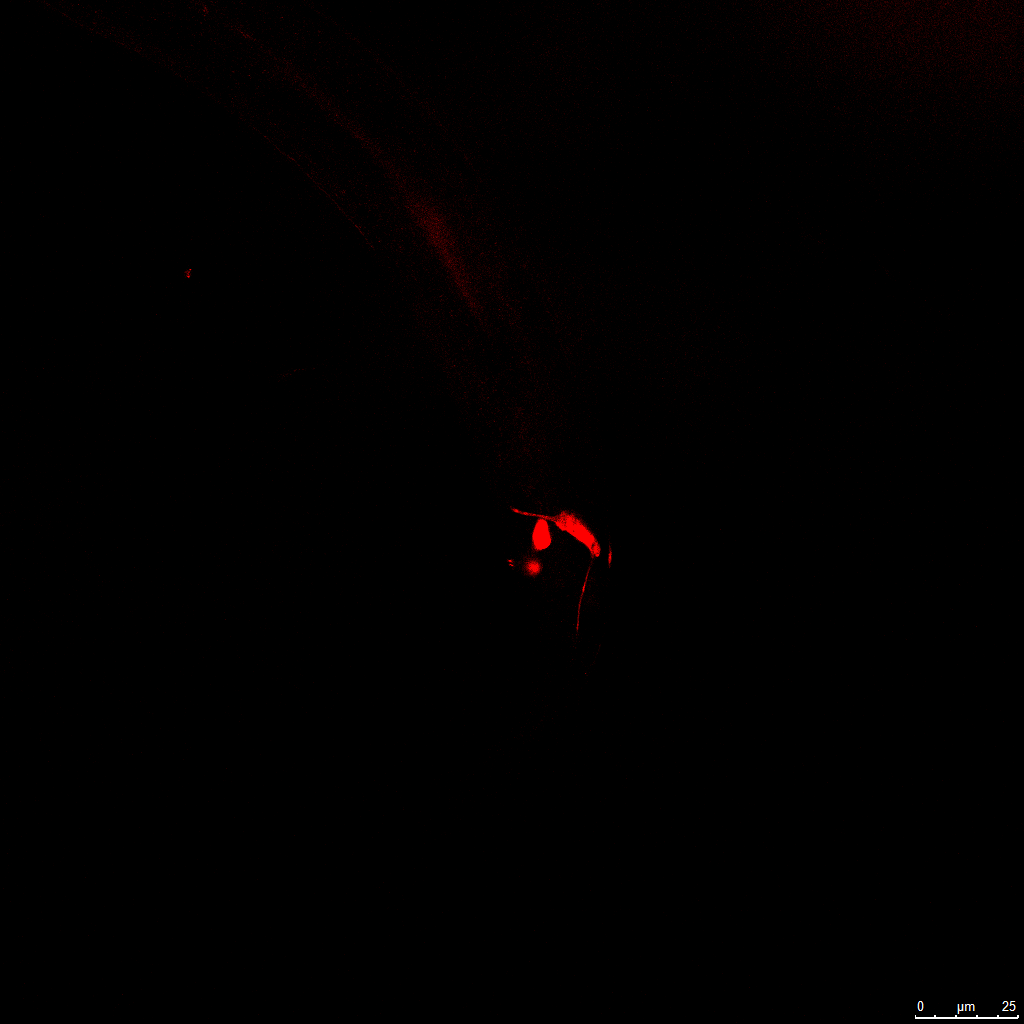

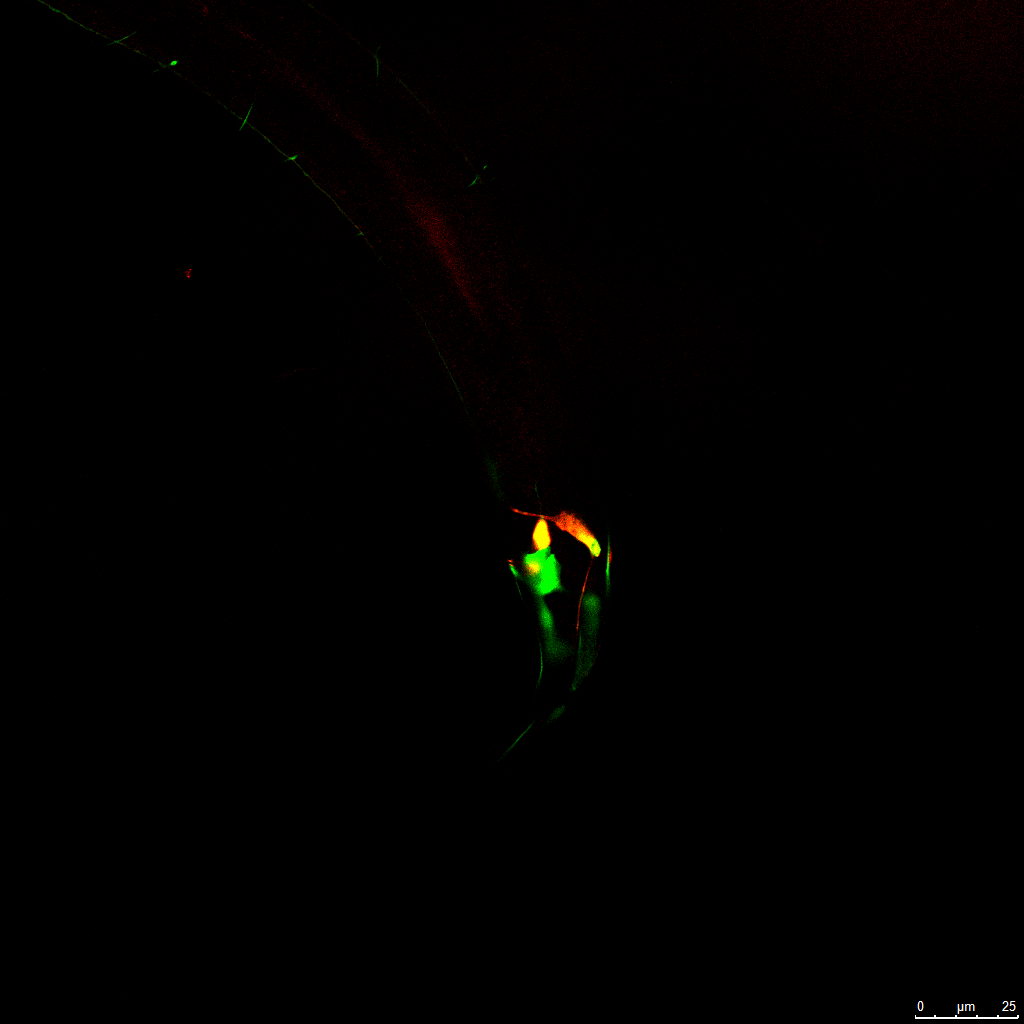


Merged

*Punc-80::mCherry*

*PLunc-79a::GFP*

C

**Figure 6 raw images.**

Note: each panel was cropped to generate the corresponding panel in Fig. 6.


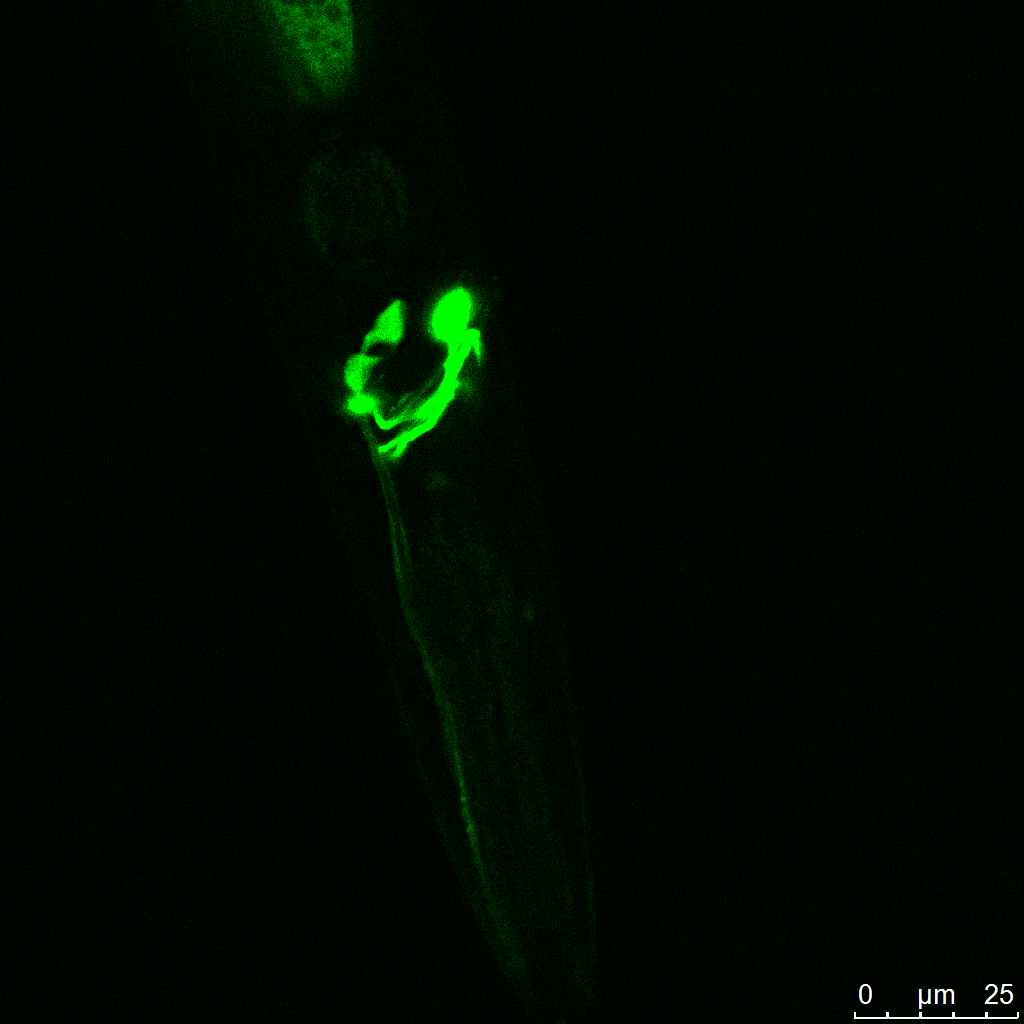

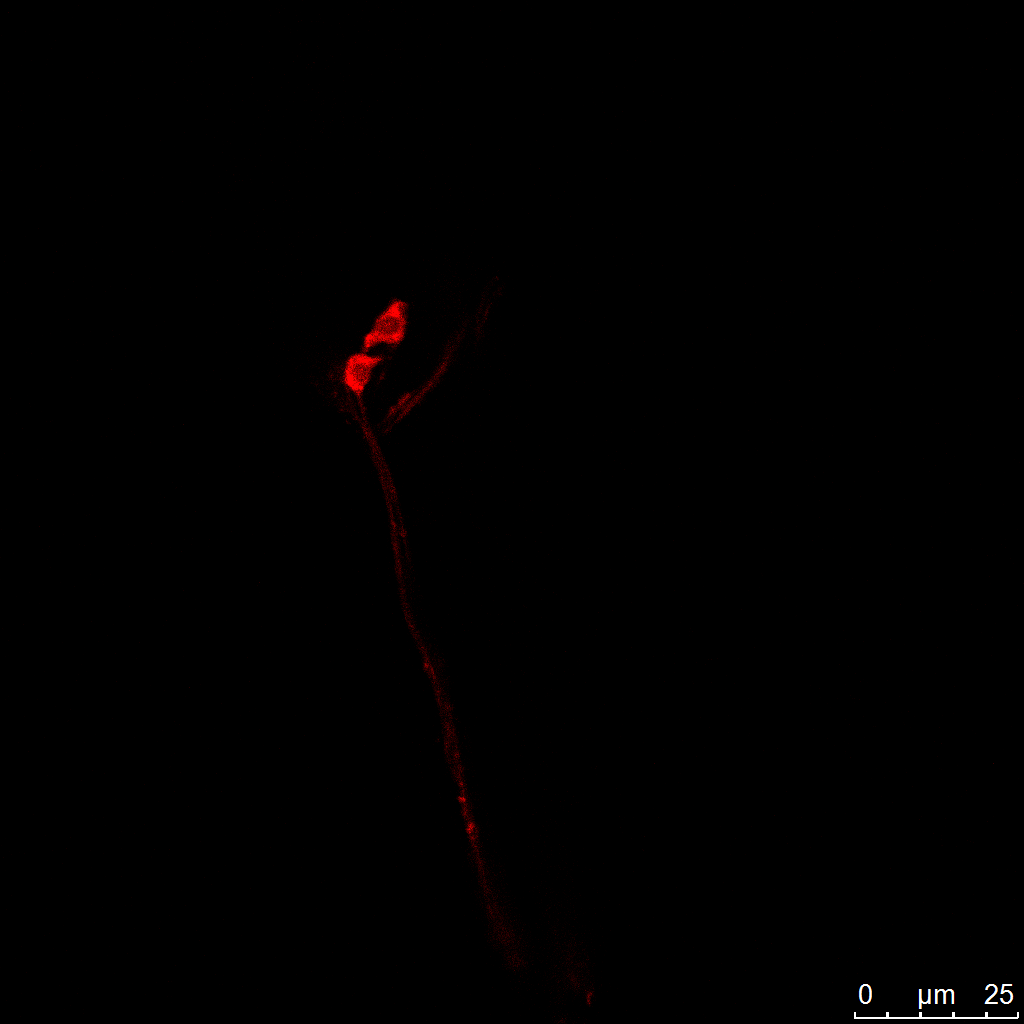

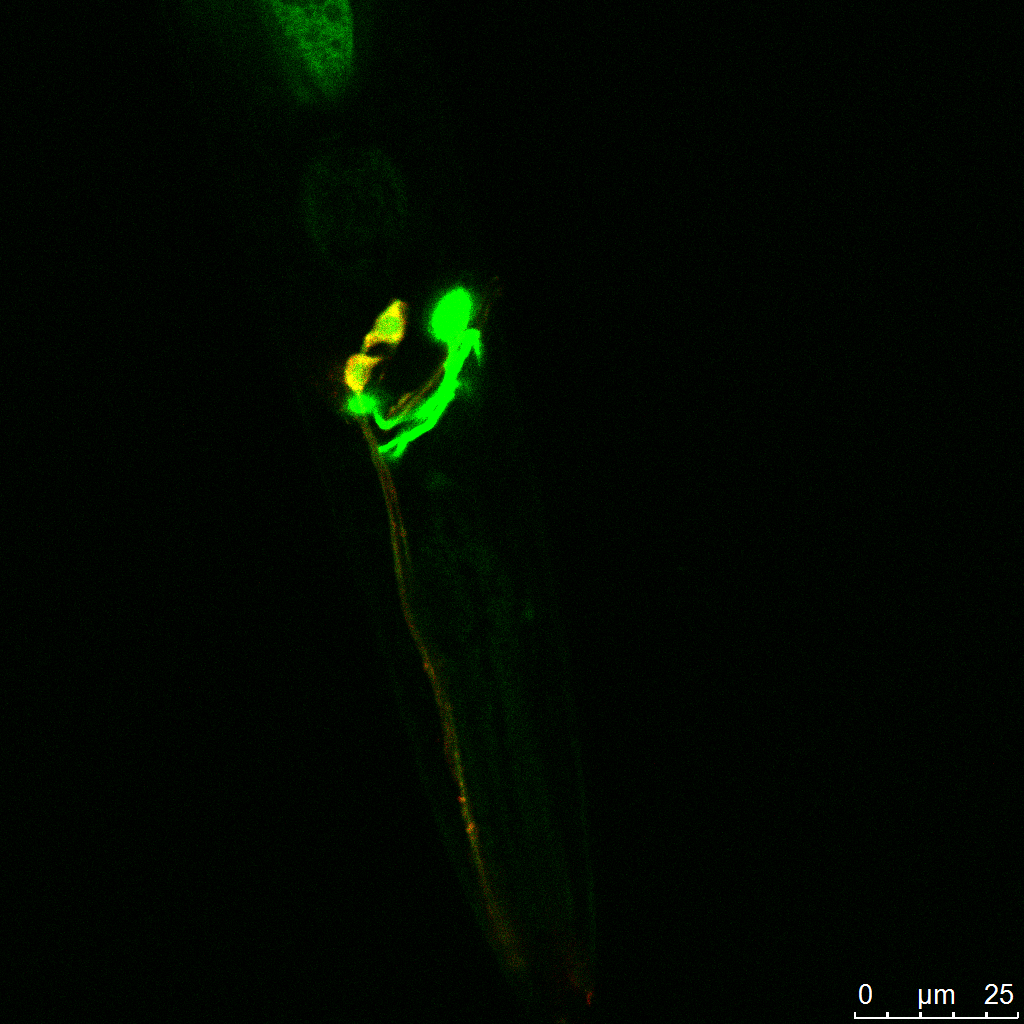


Merged

DiI labeling

*PSunc-79a::GFP*

A


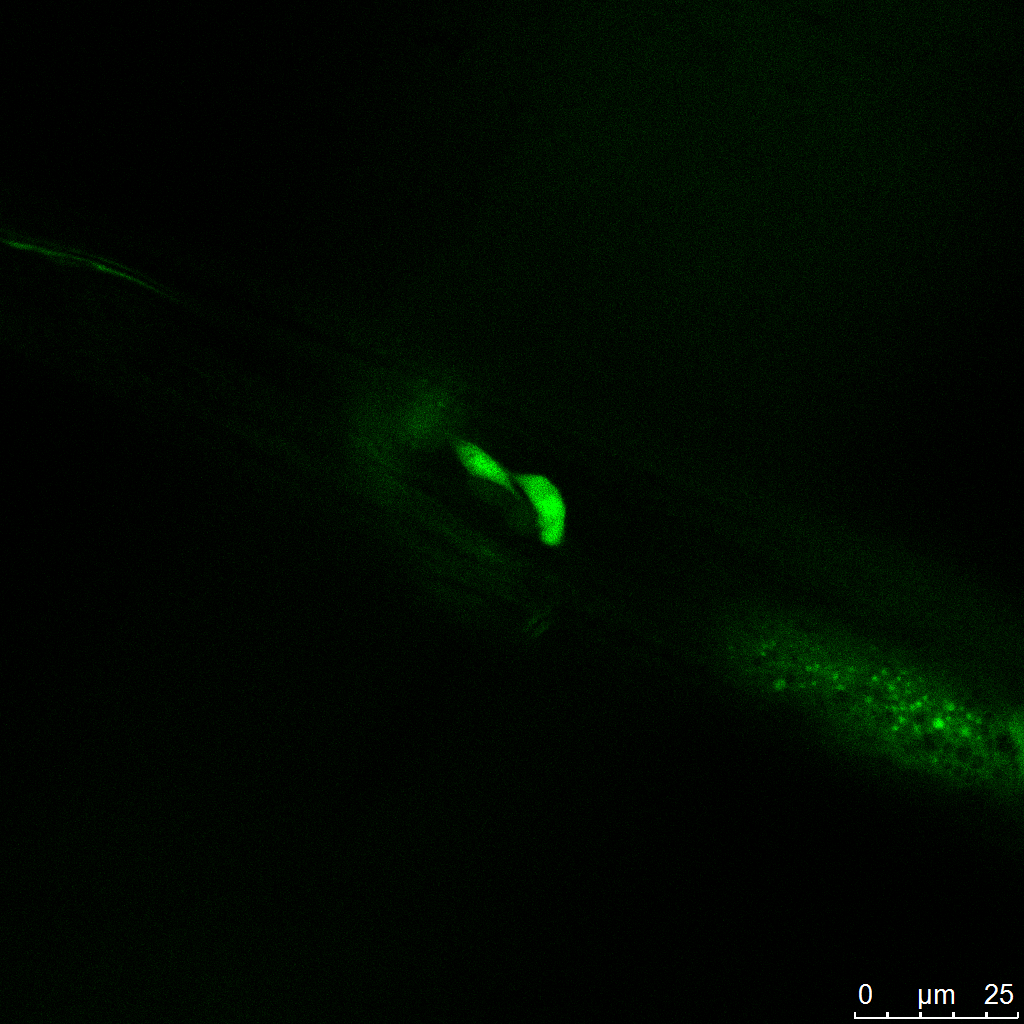

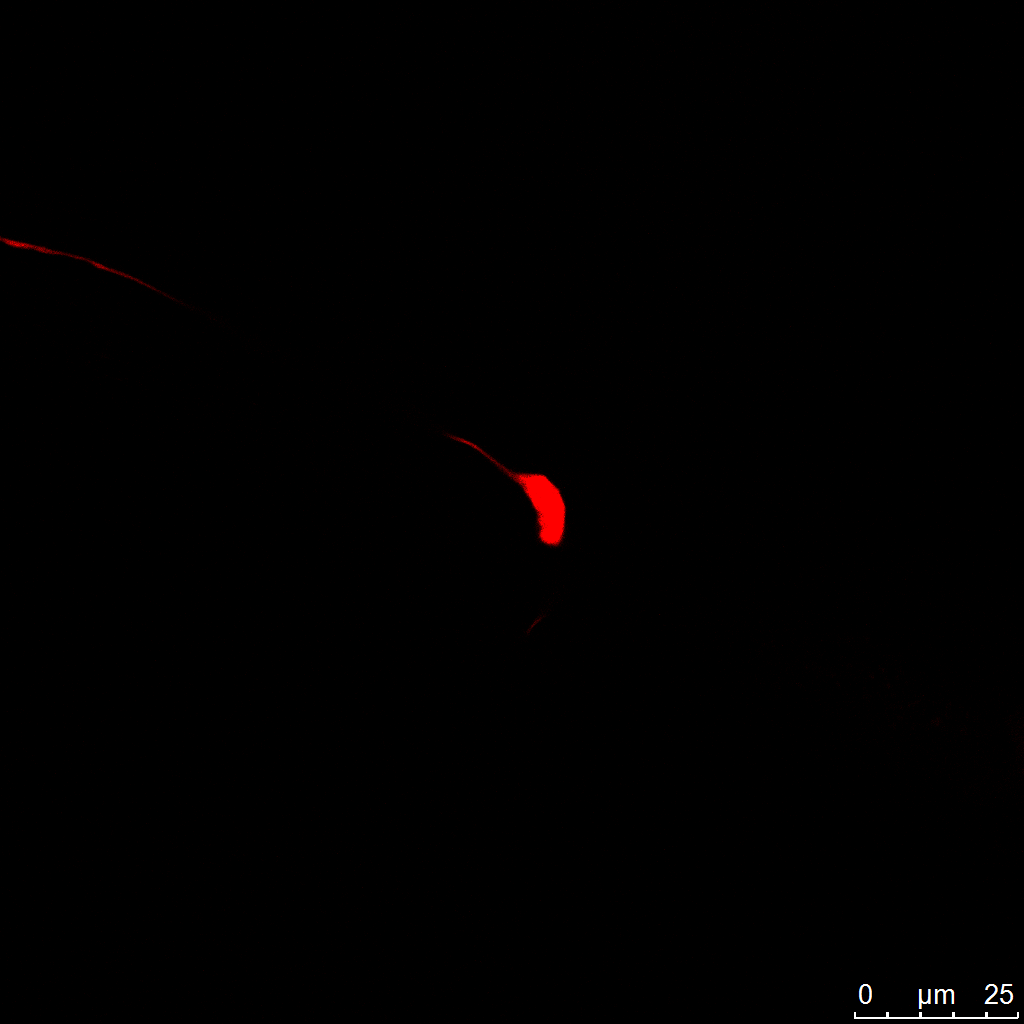

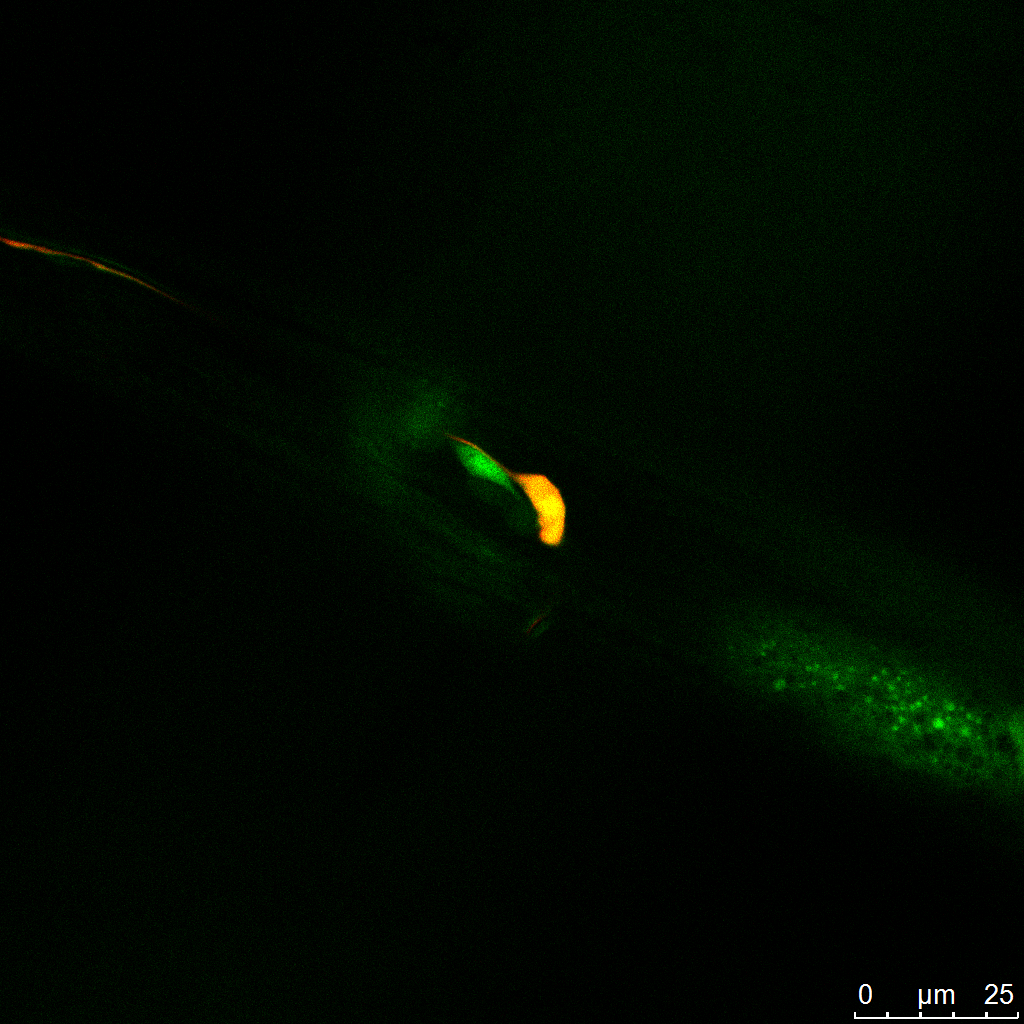


Merged

*Pssu-1::mCherry*

*PSunc-79a::GFP*

B


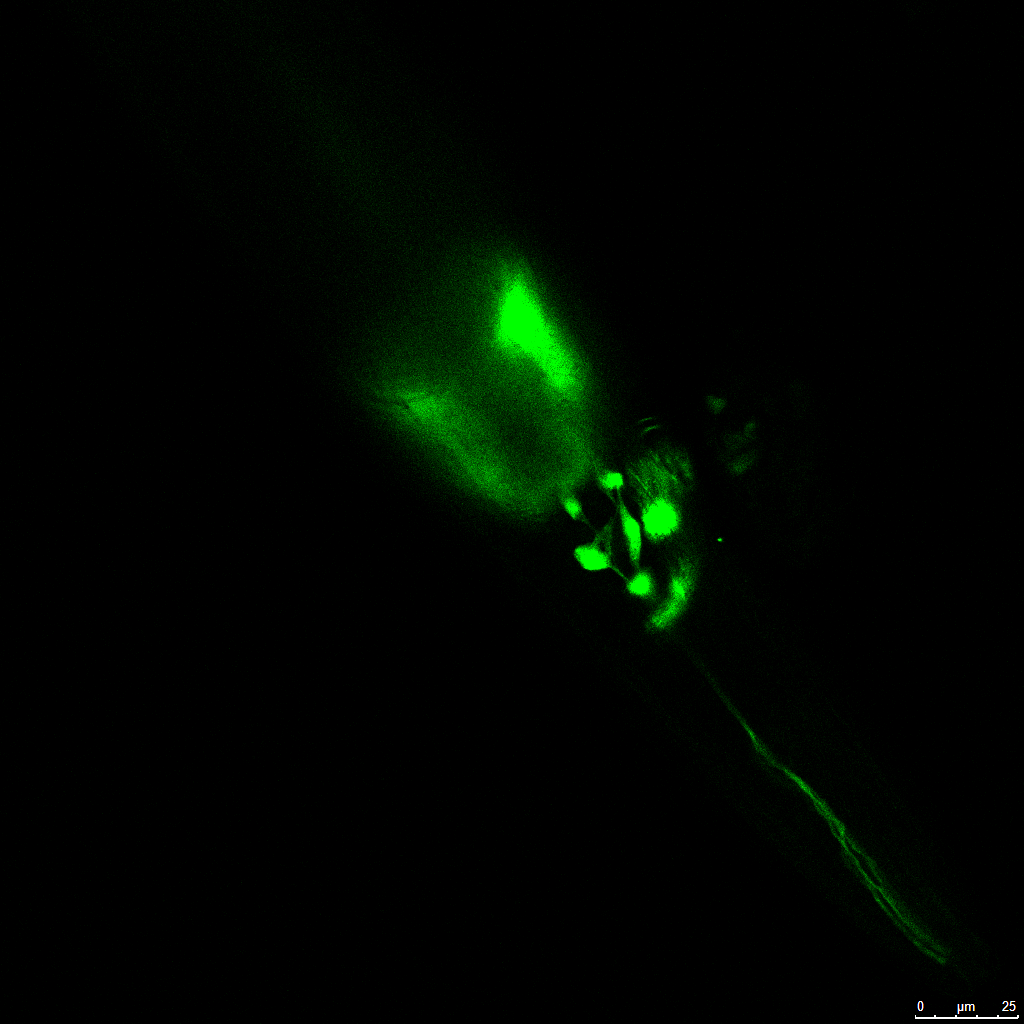

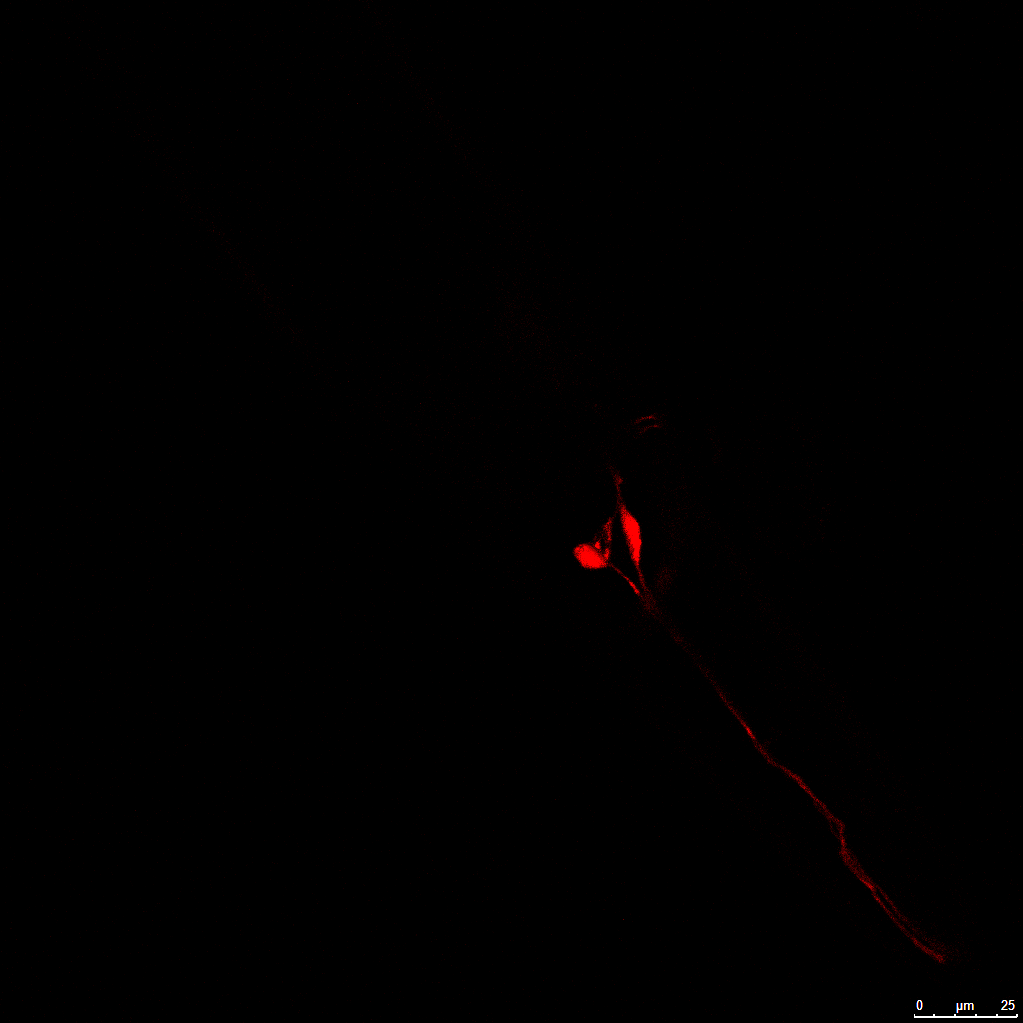

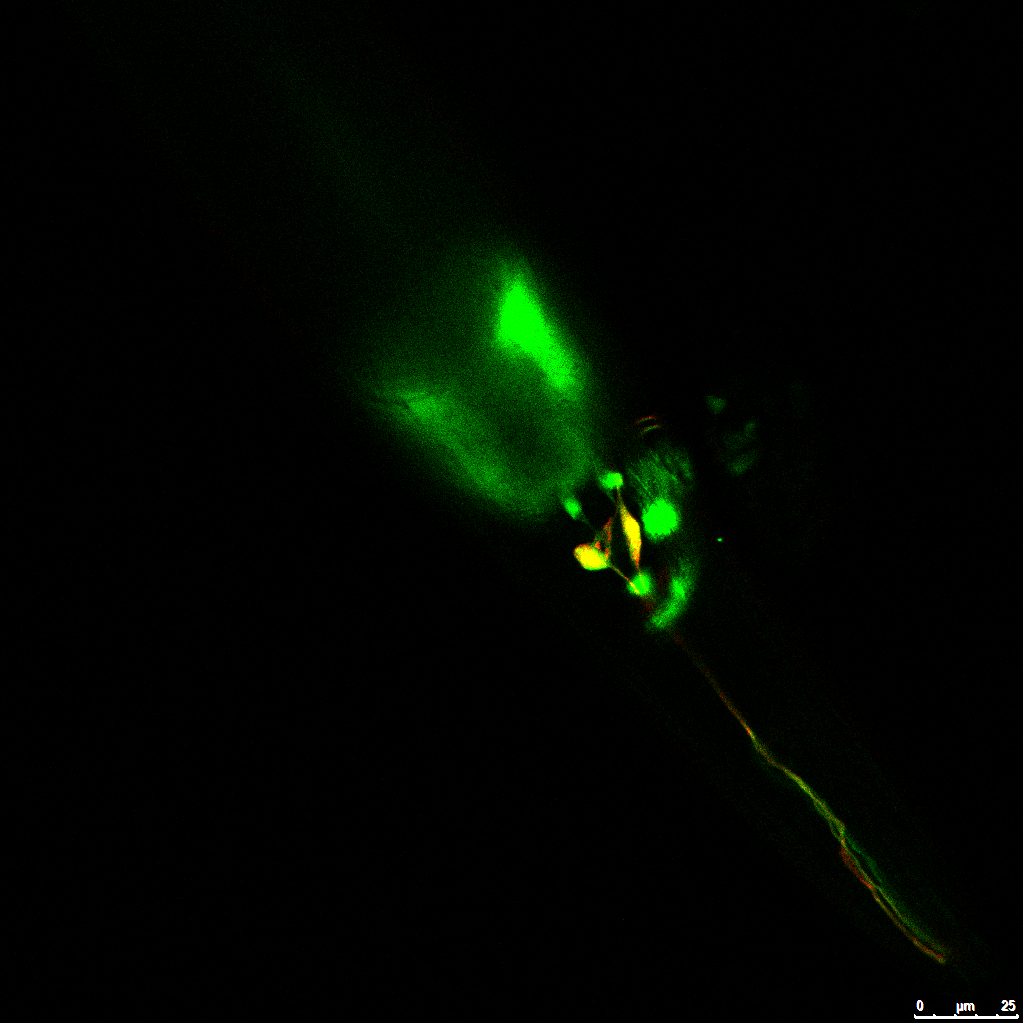


*PSunc-79a::GFP*

Merged

*Psra-6::mCherry*

C


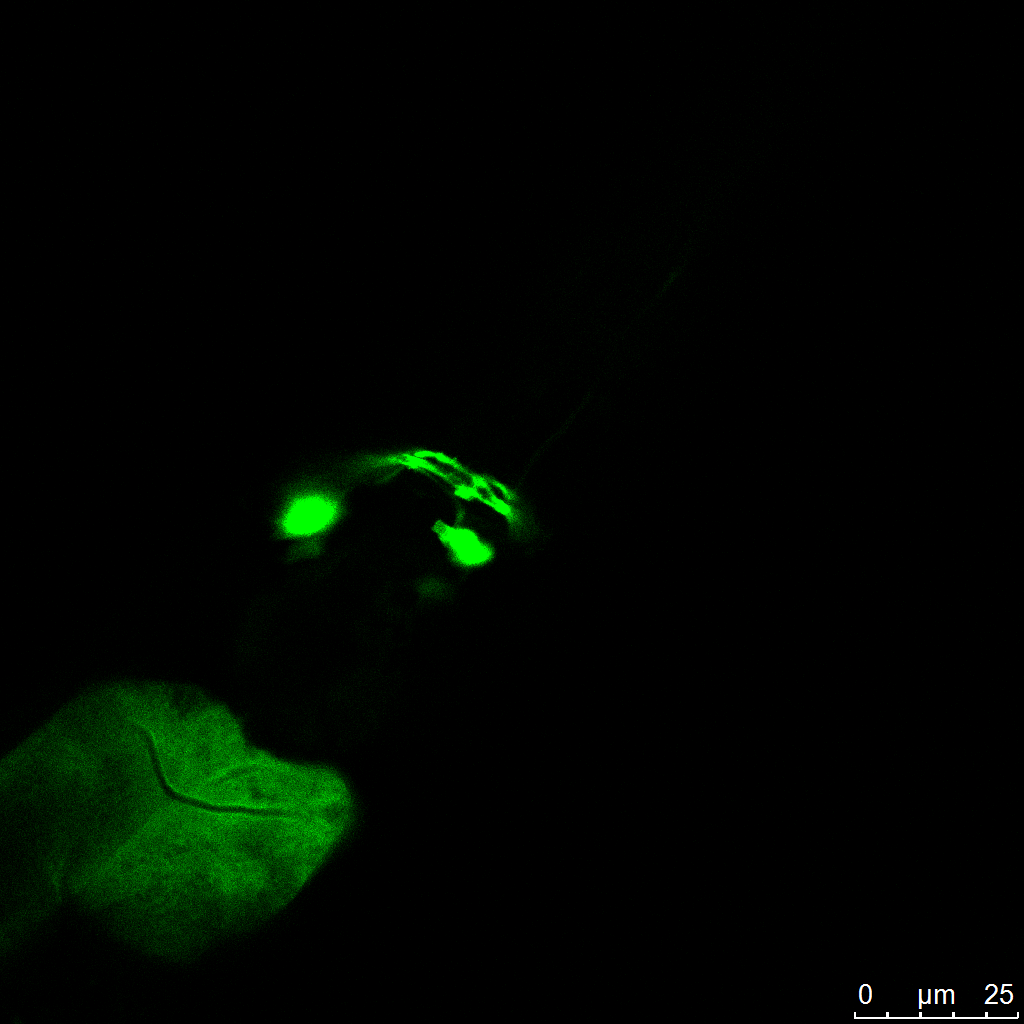

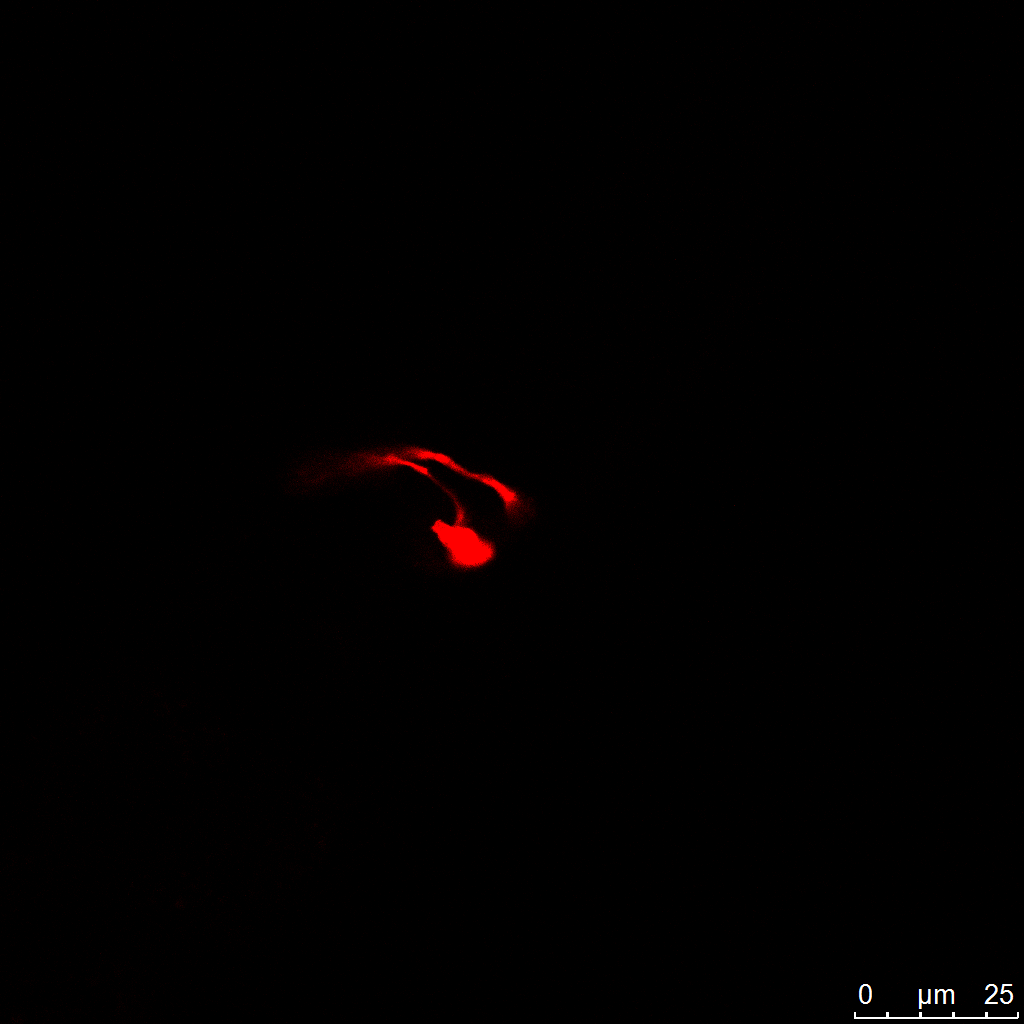

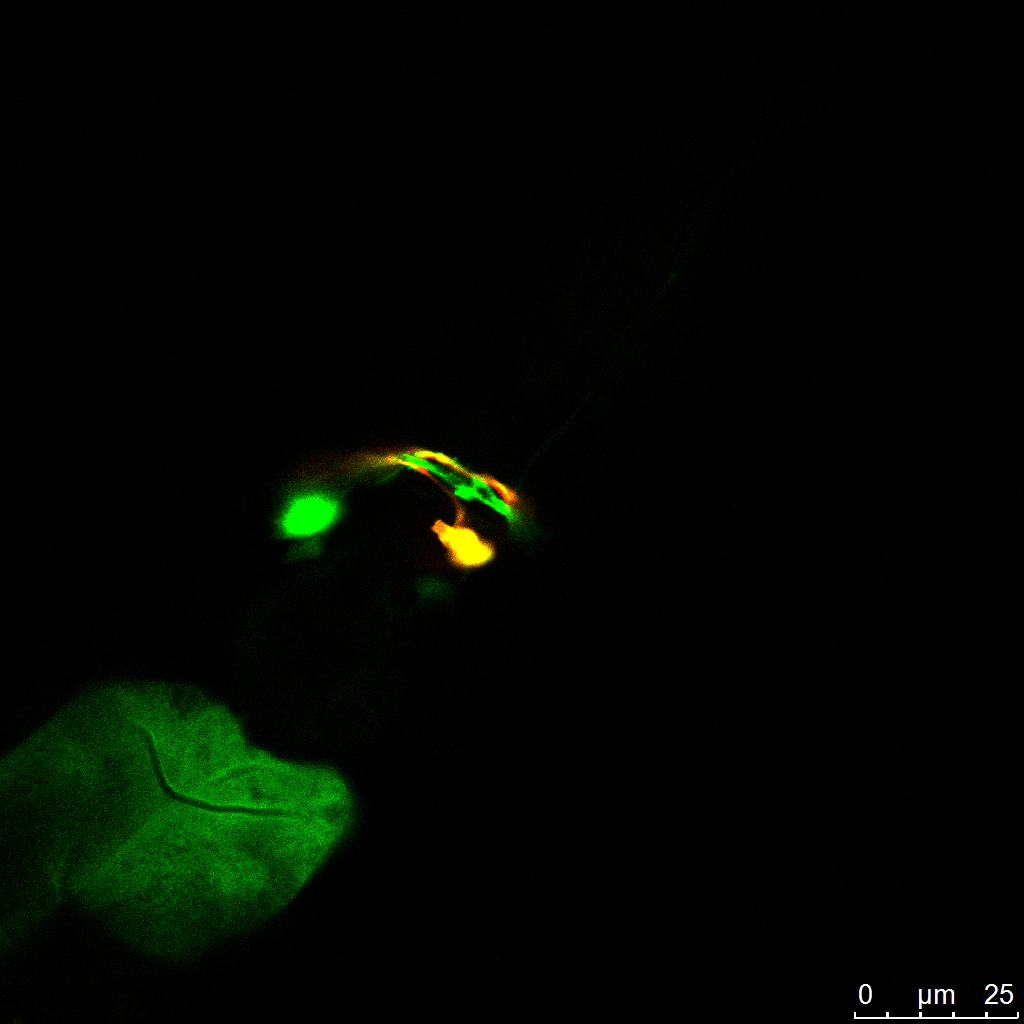


Merged

*Pglr-3::mCherry*

*PSunc-79a::GFP*

D

**Figure S2 raw images.**

Note: each panel was cropped to generate the corresponding panel in Fig. S2.


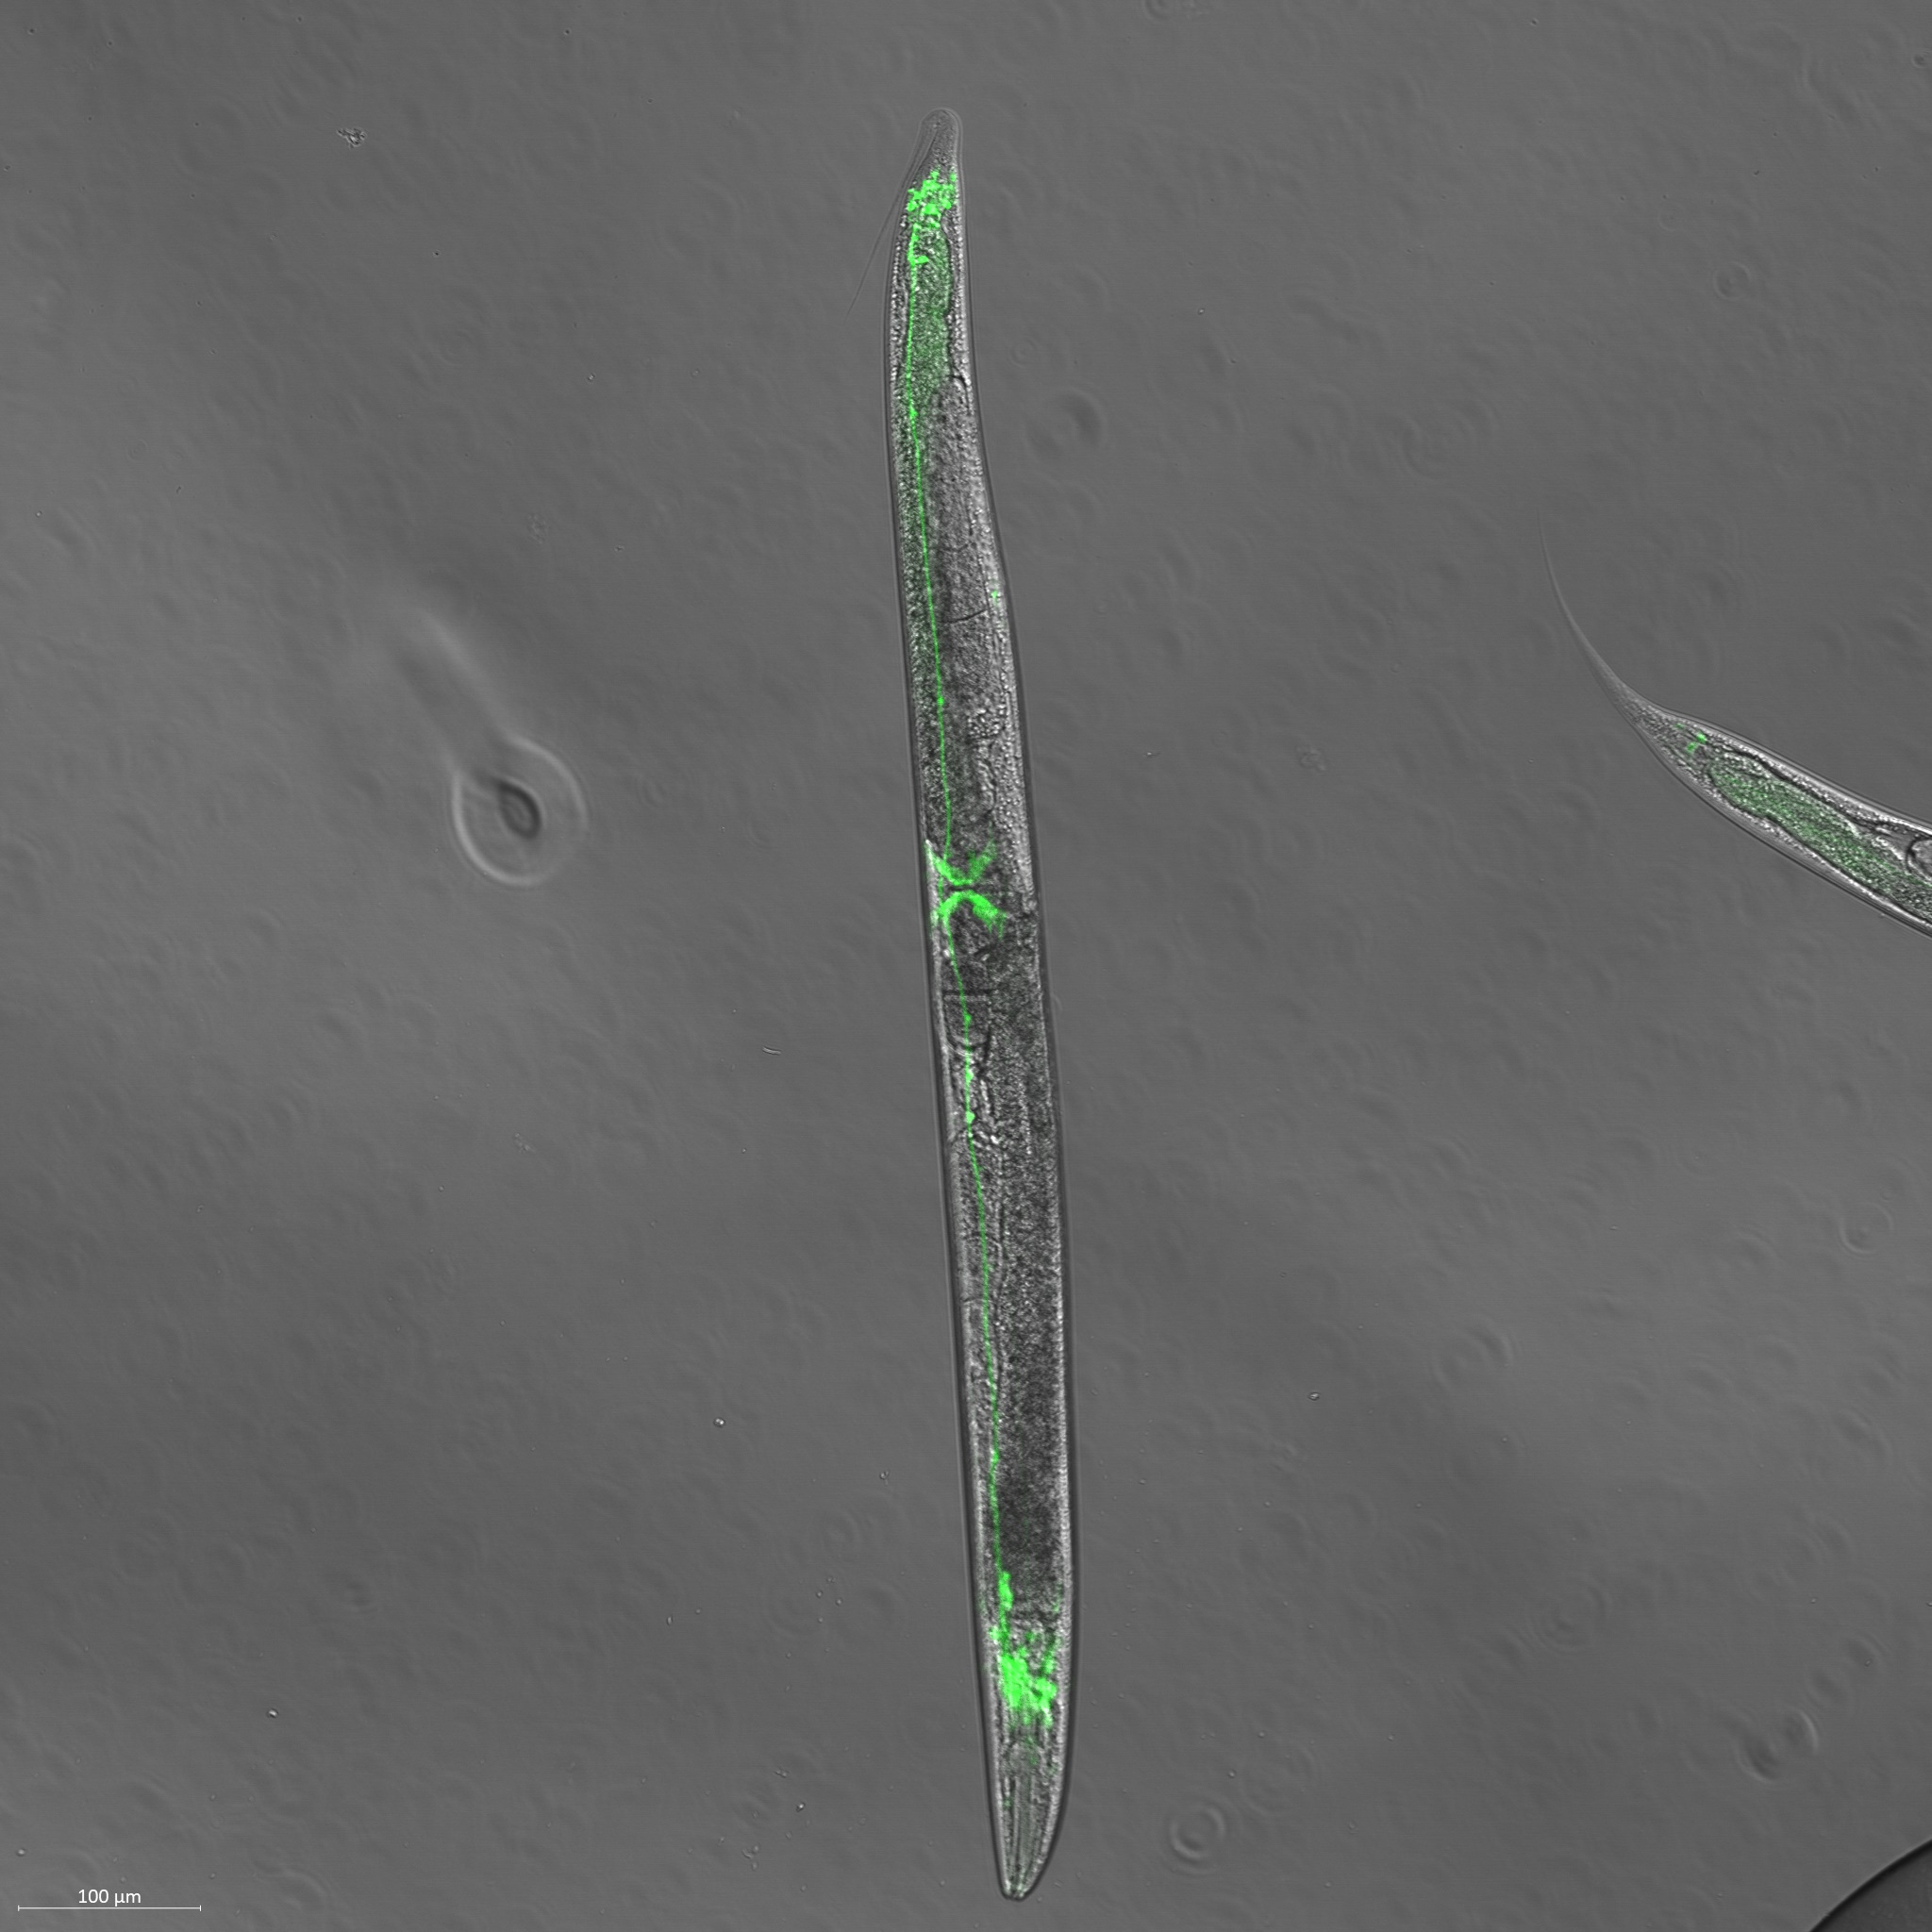

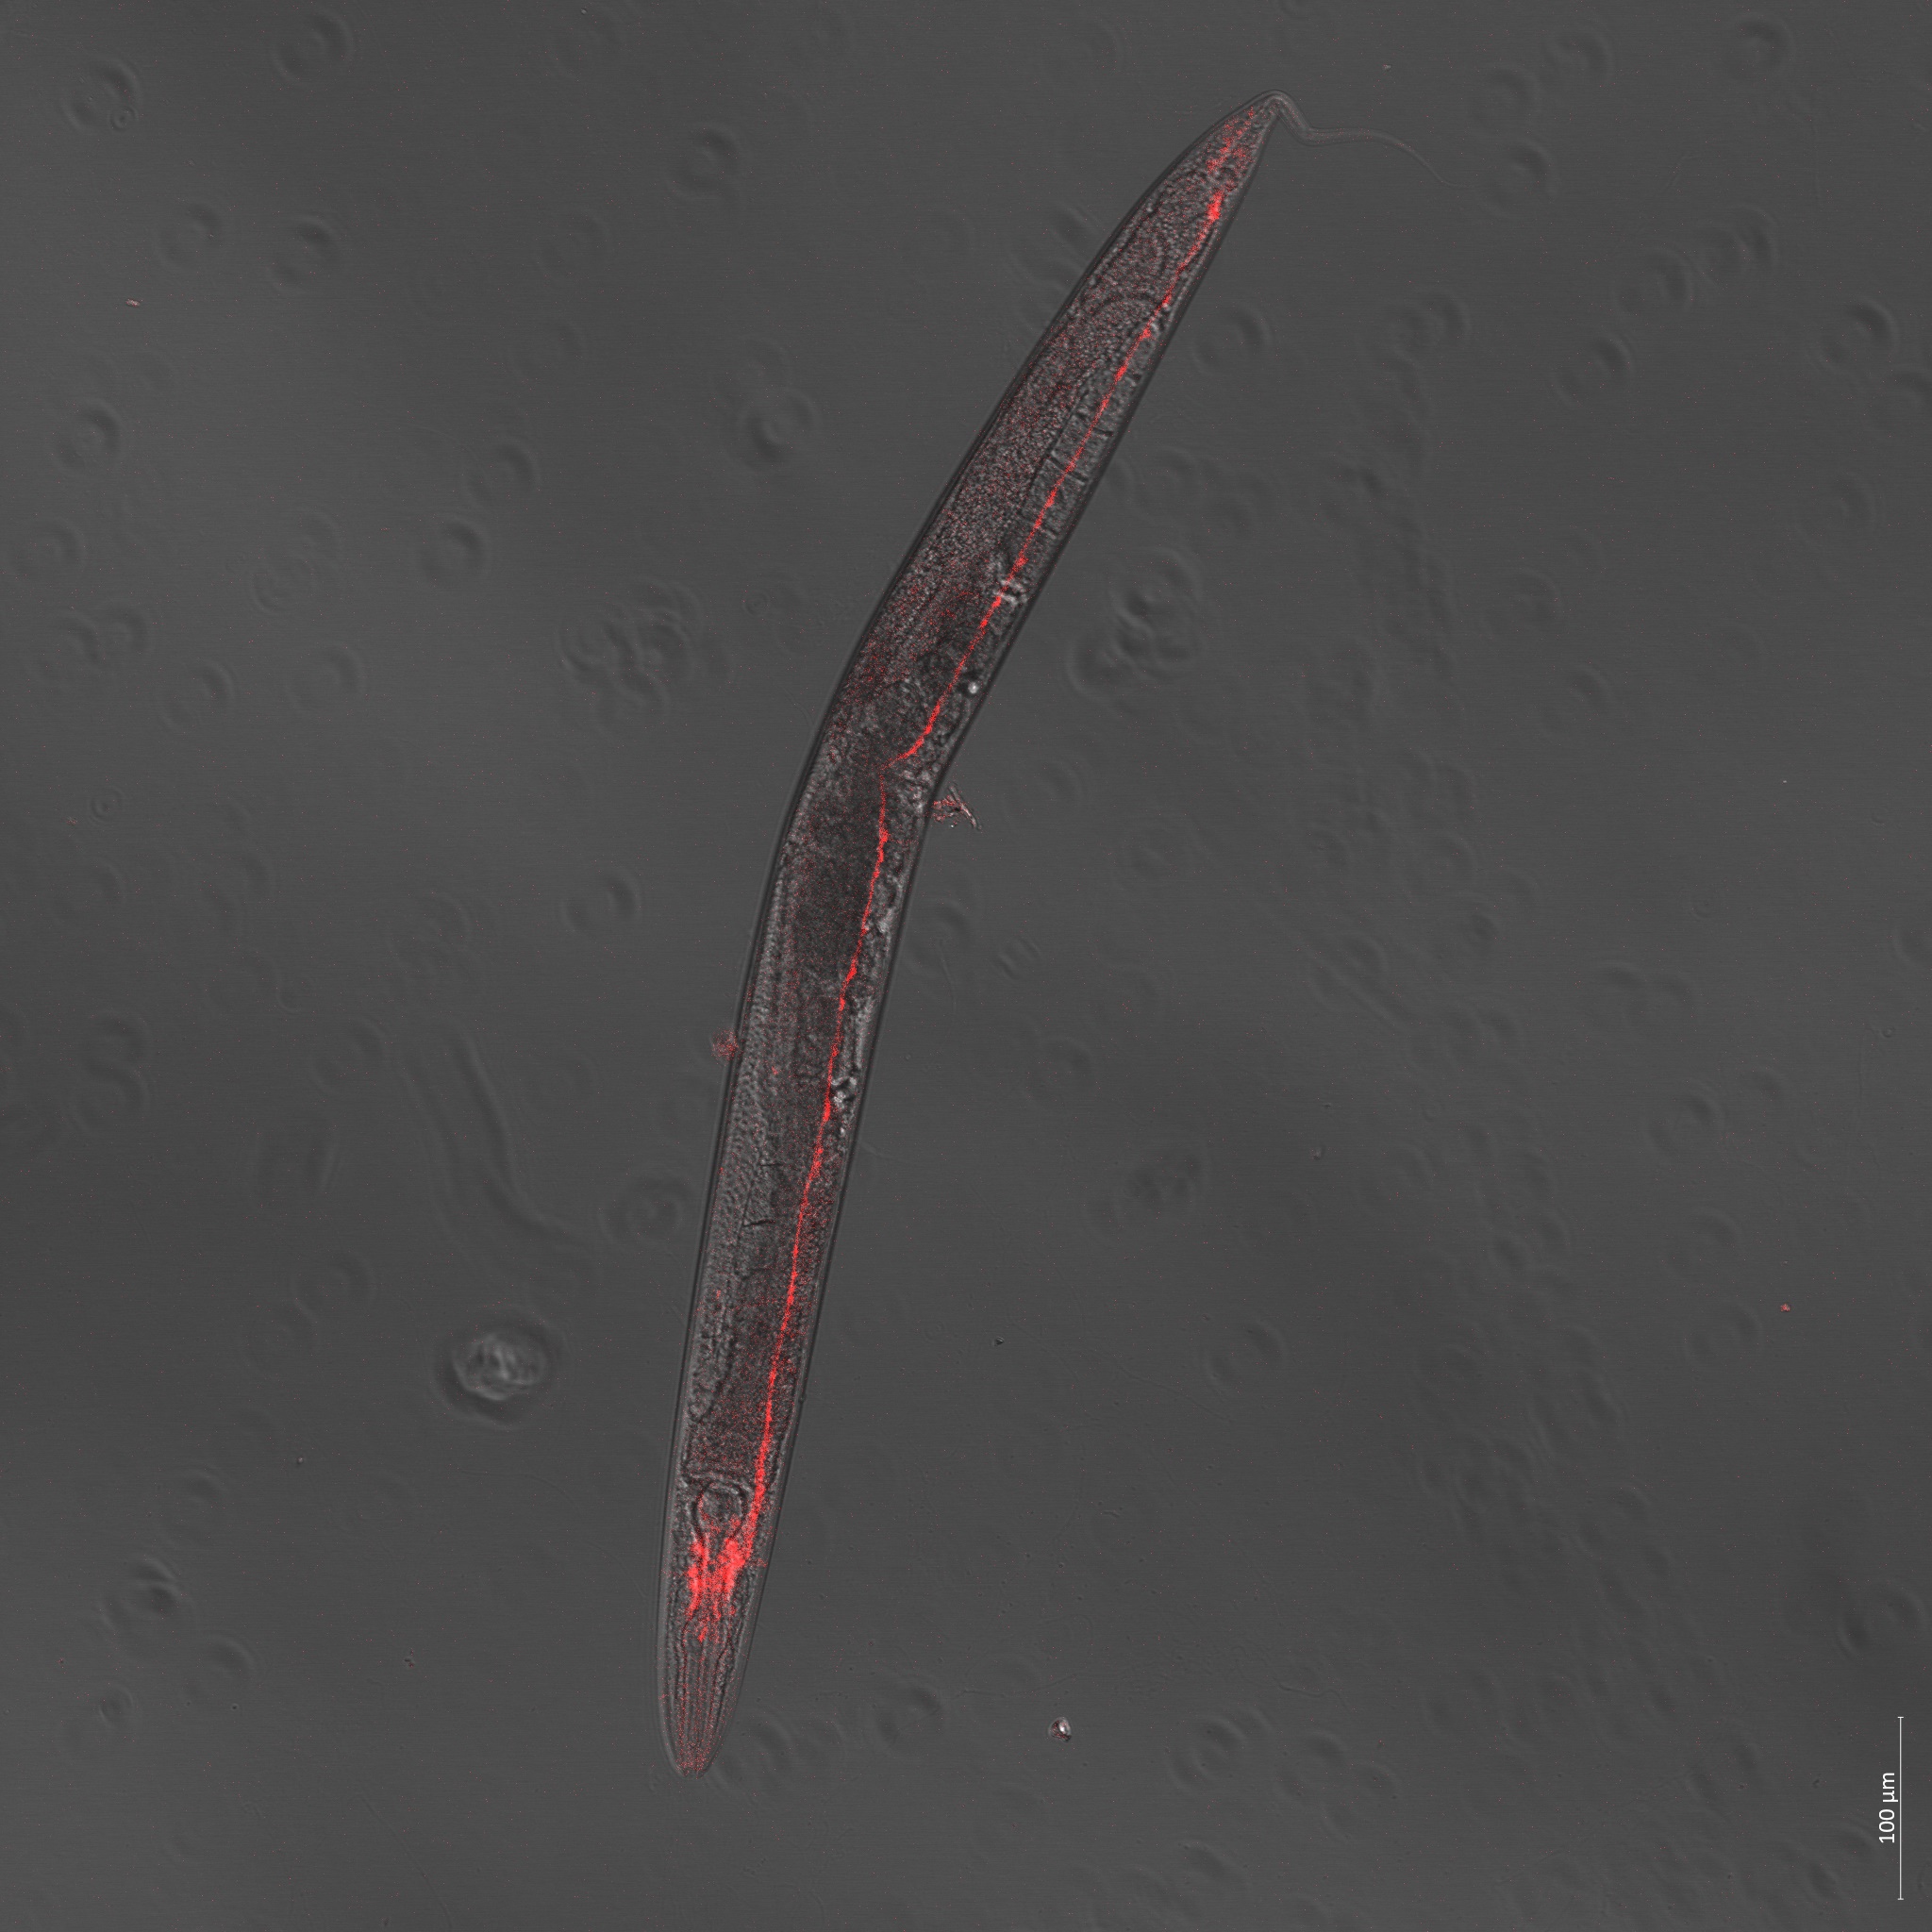


*Punc-80::GFP*

*Pnlf-1::mCherry*

B

A


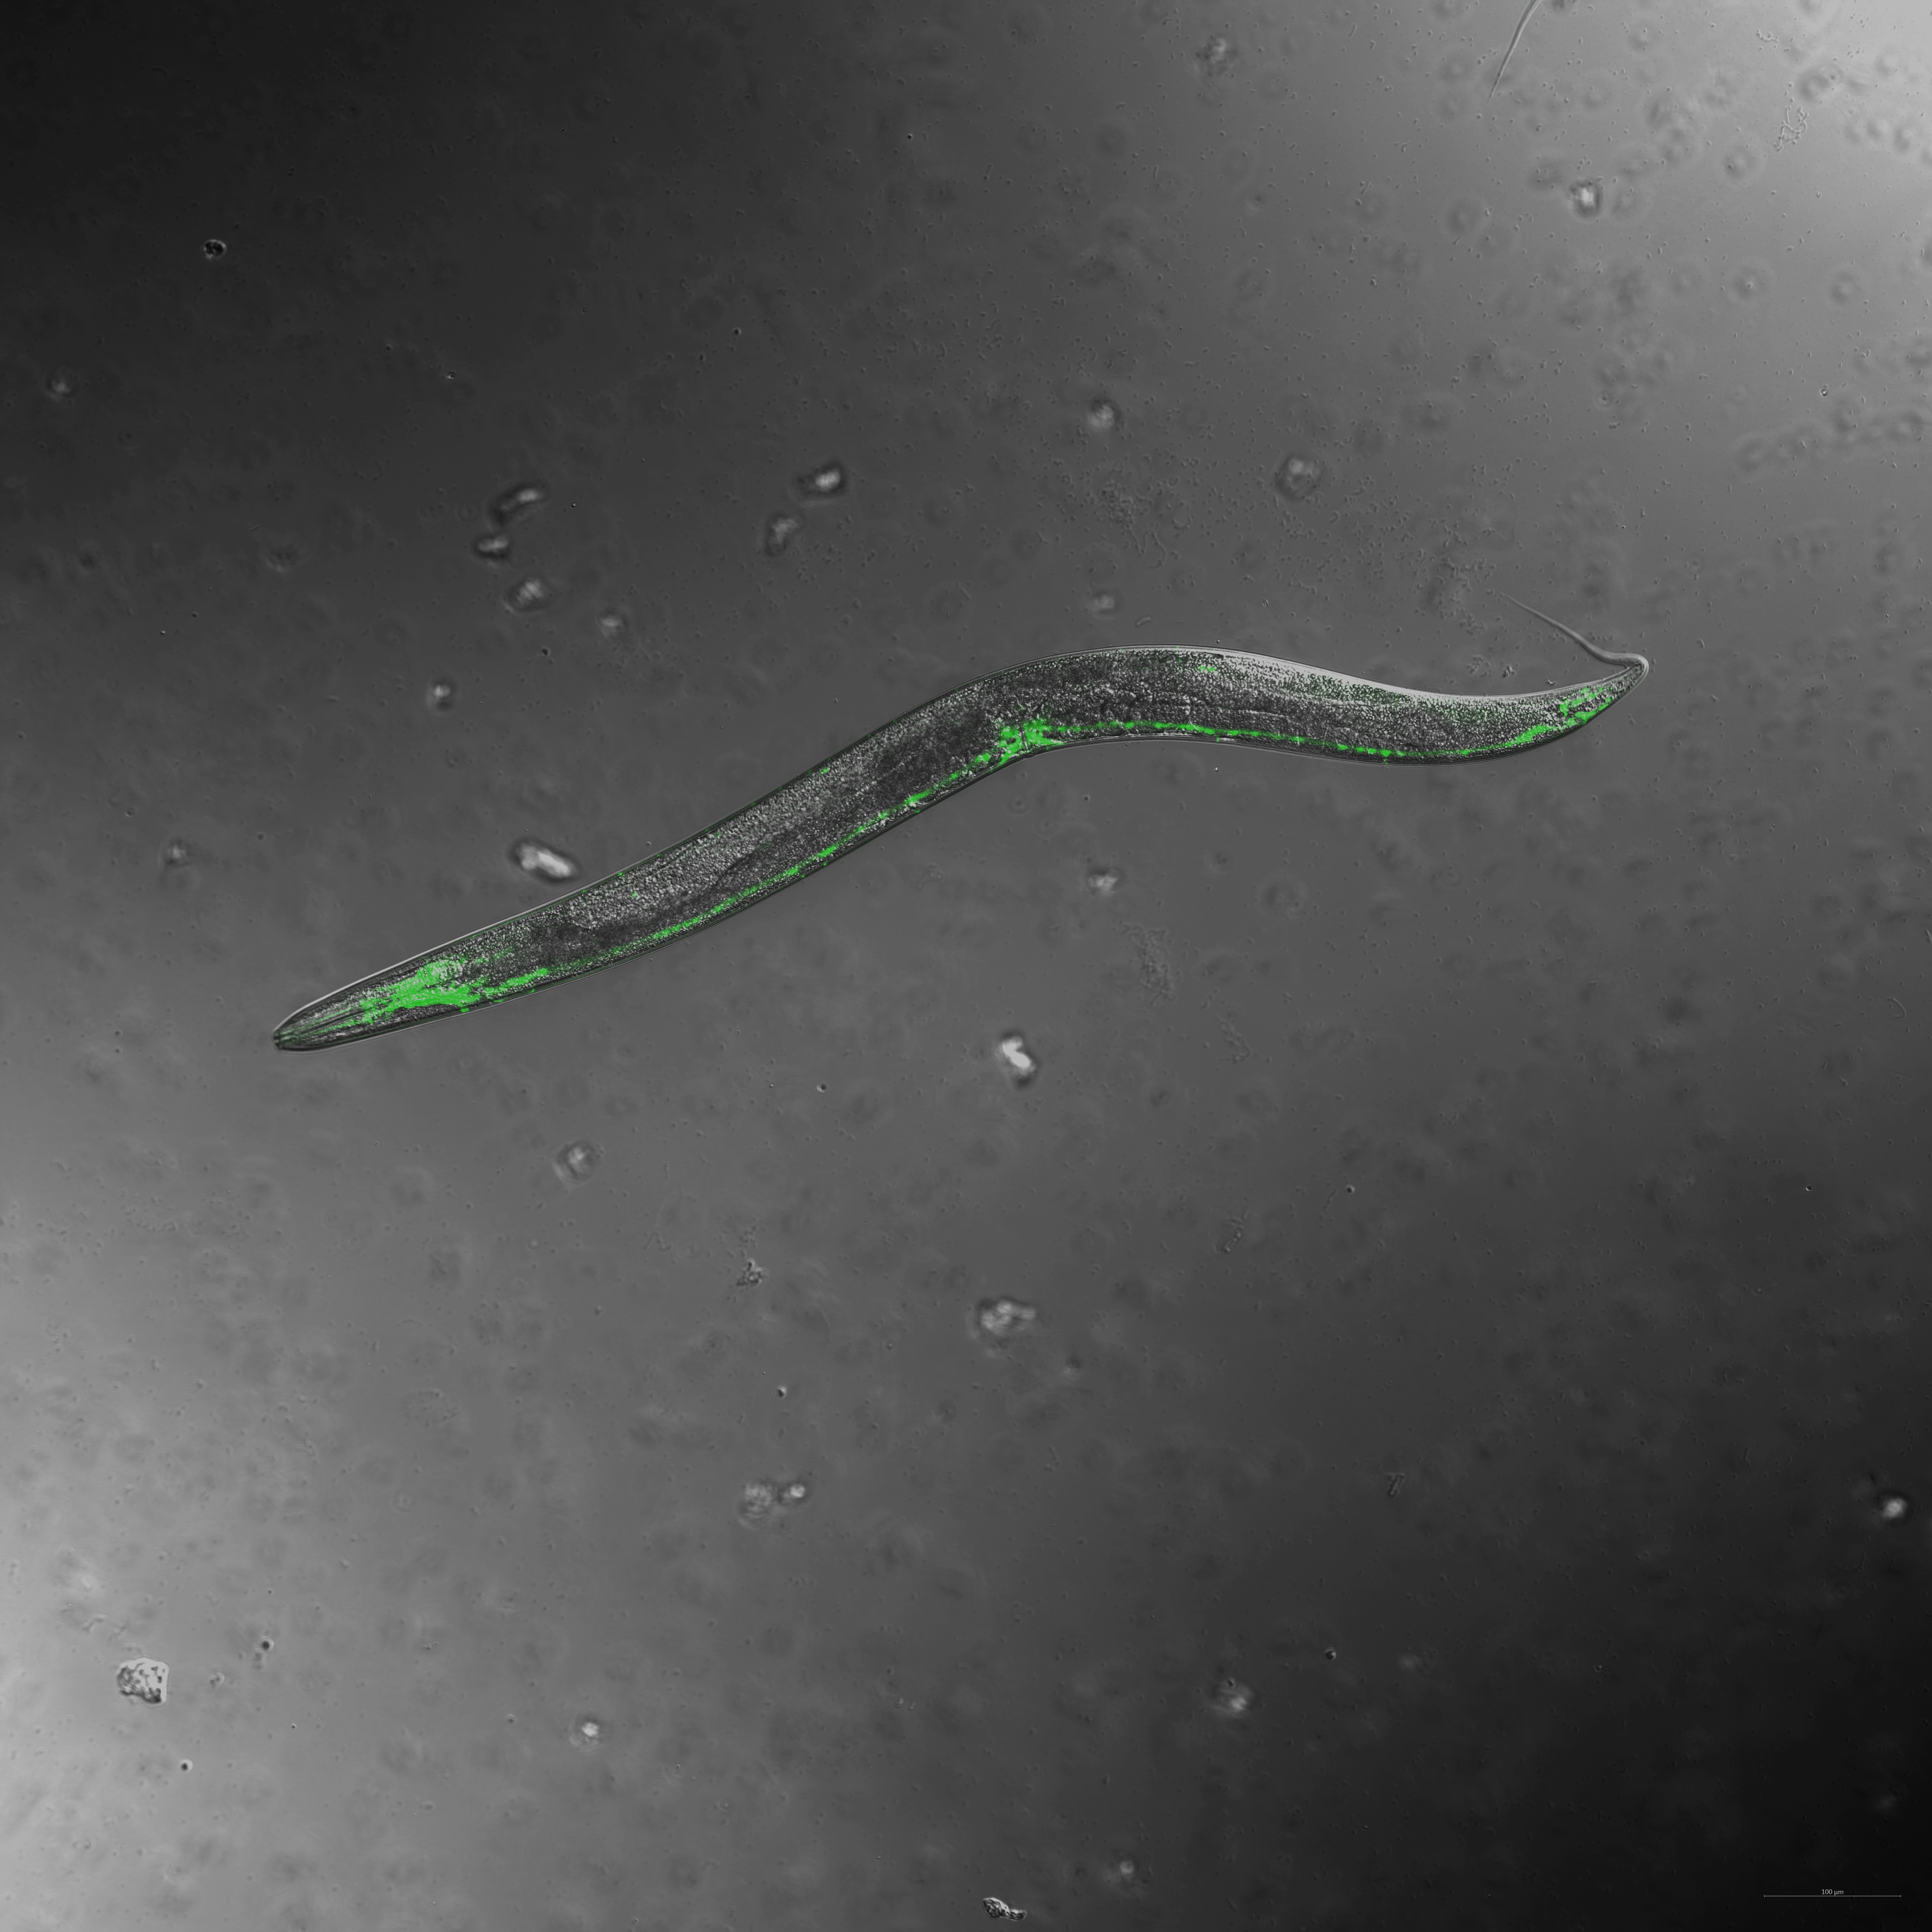

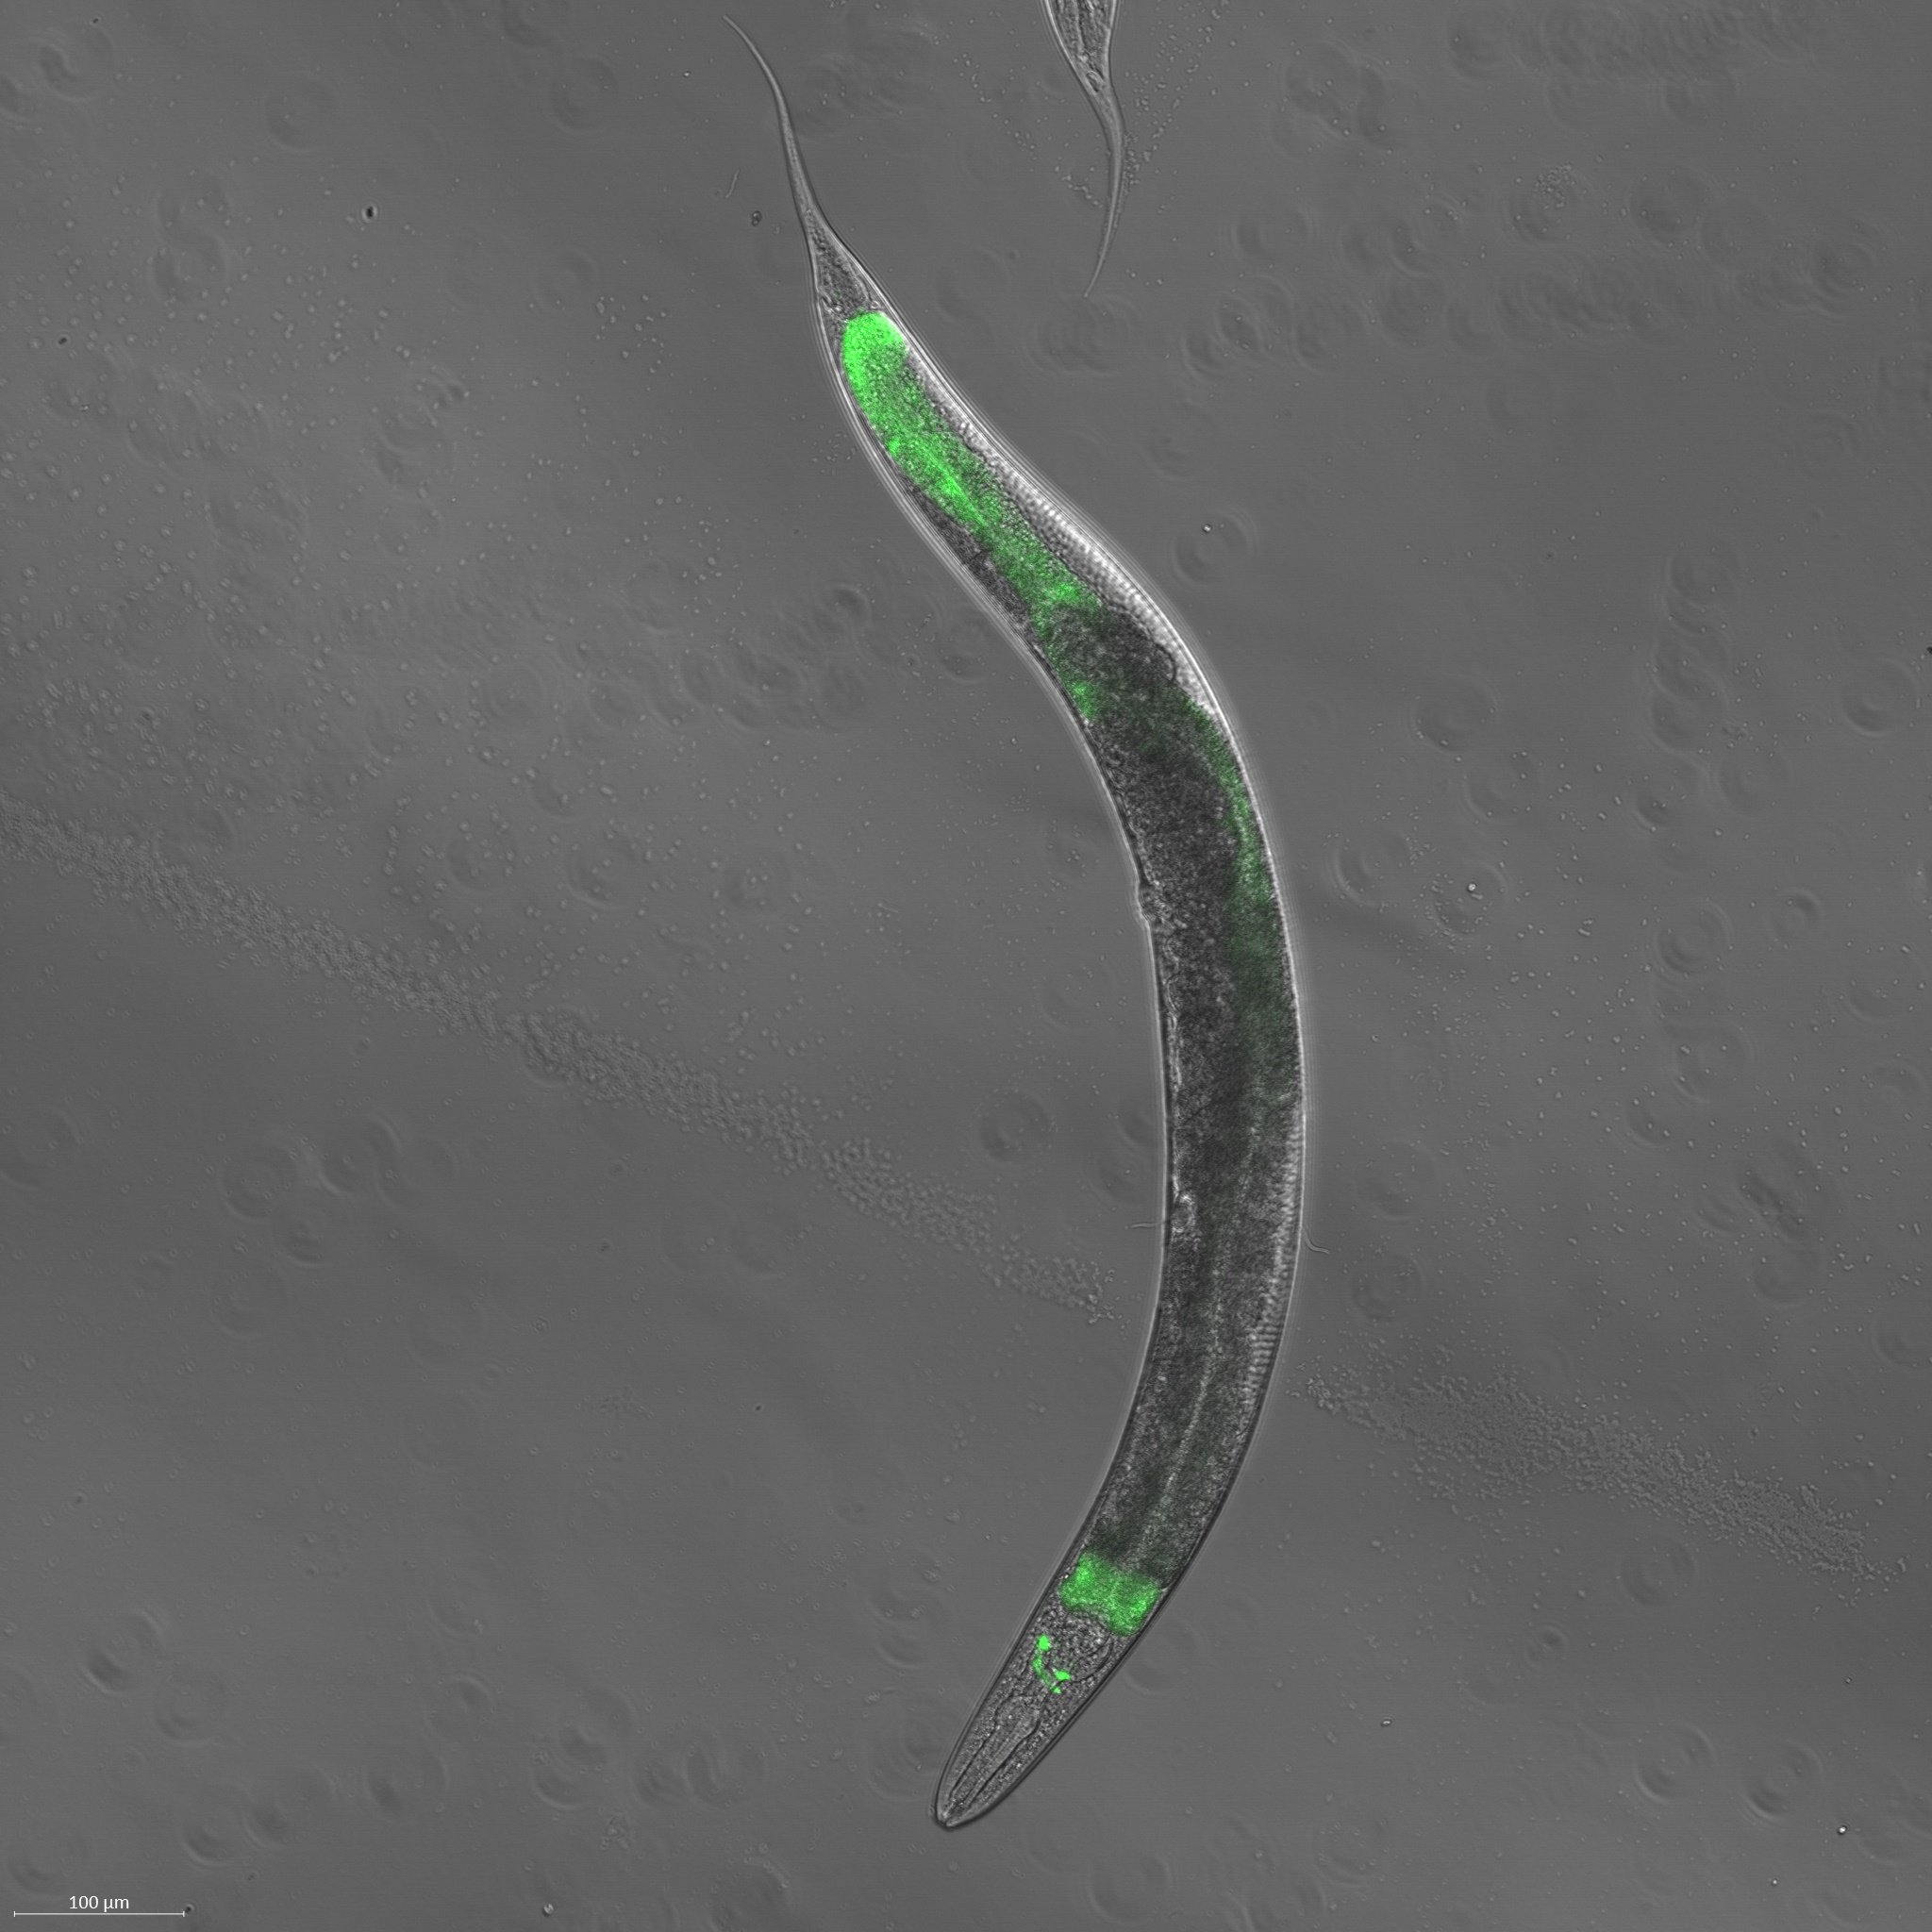


*PSunc-79a::GFP*

*PLunc-79a::GFP*

D

C

**Figure S3 raw images.**

Note: each panel was cropped to generate the corresponding panel in Fig. S3.


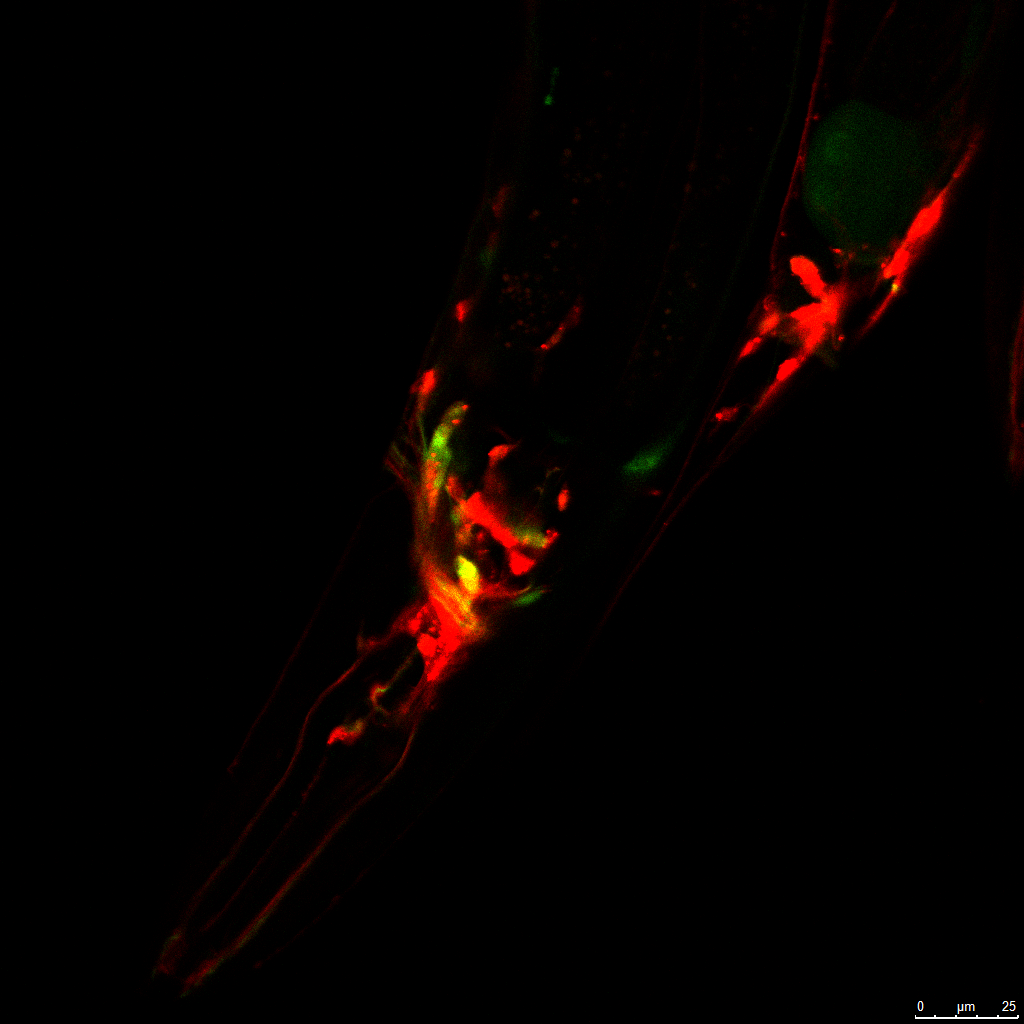

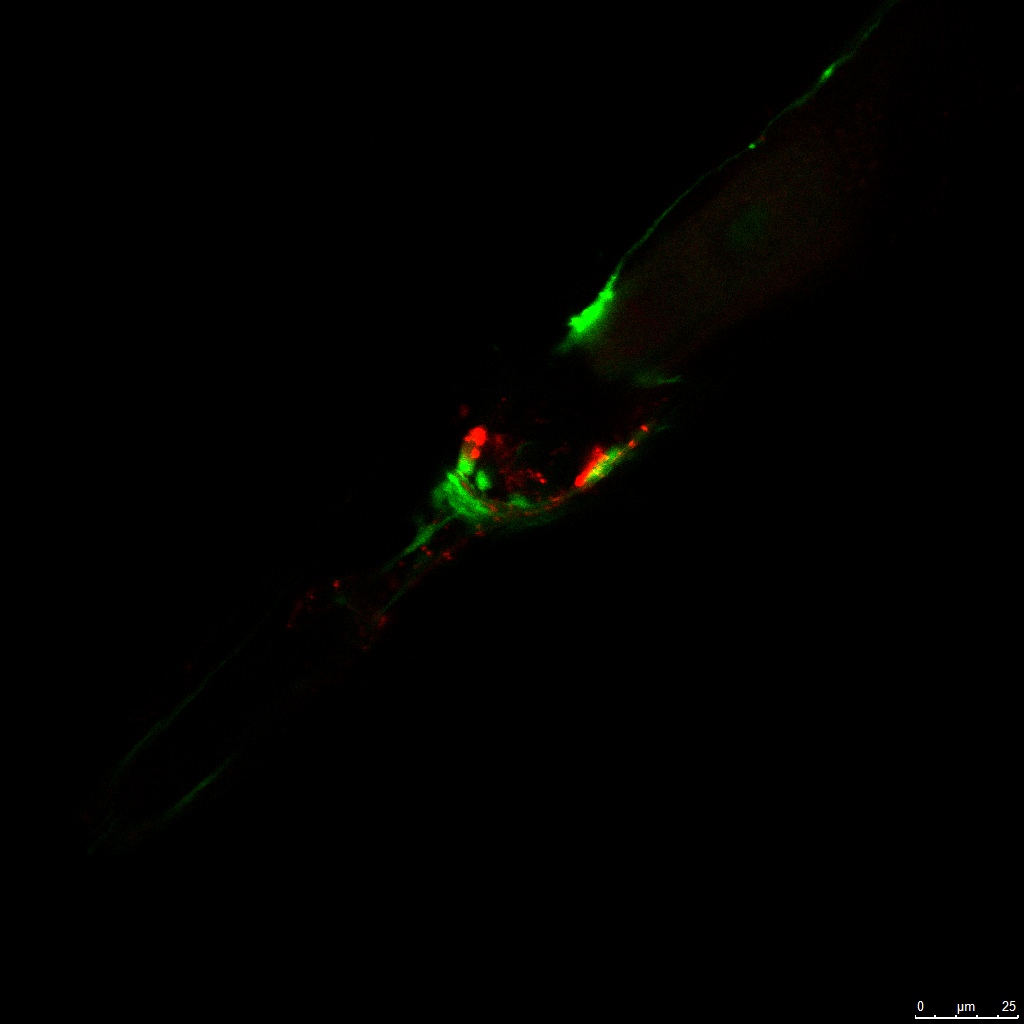


*Punc-80::GFP; Psra-11::mCherry*

*Punc-80::GFP; Pnlf-1::mCherry*

B

A


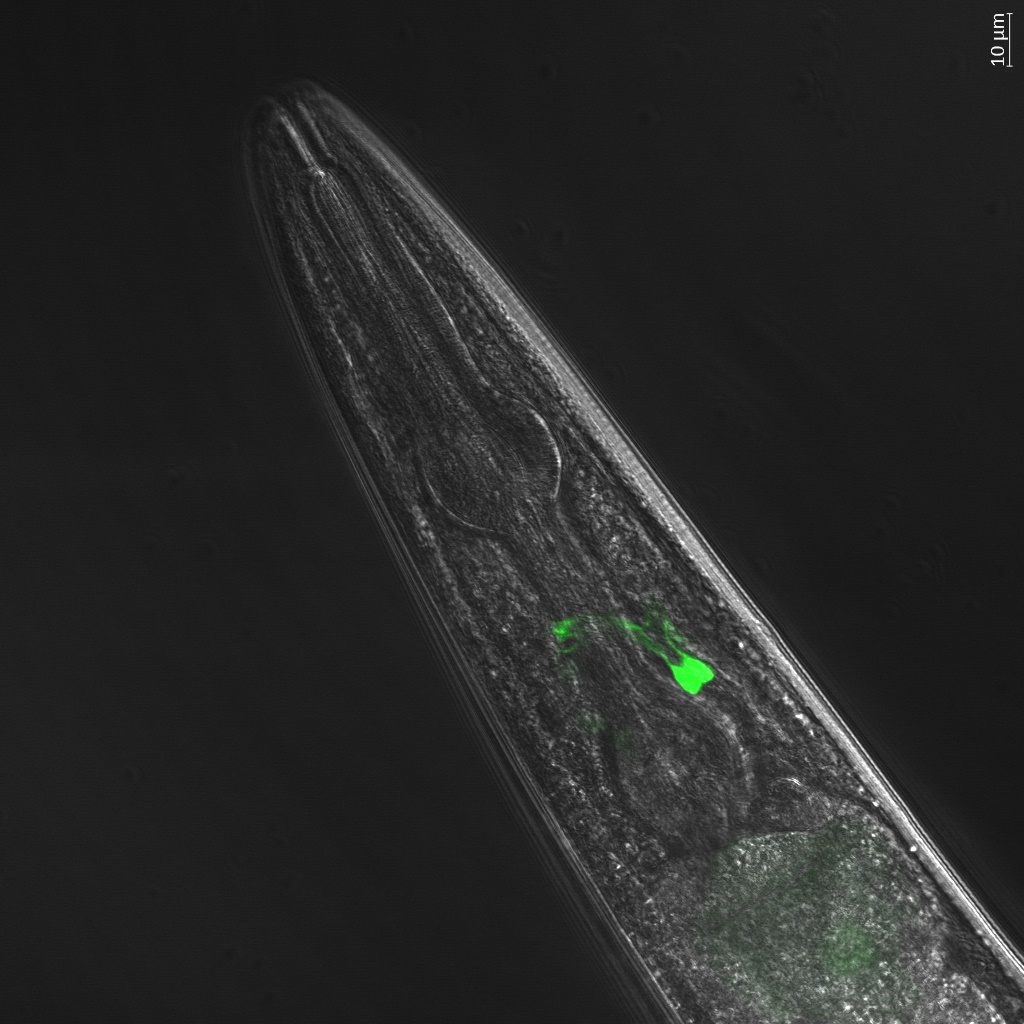

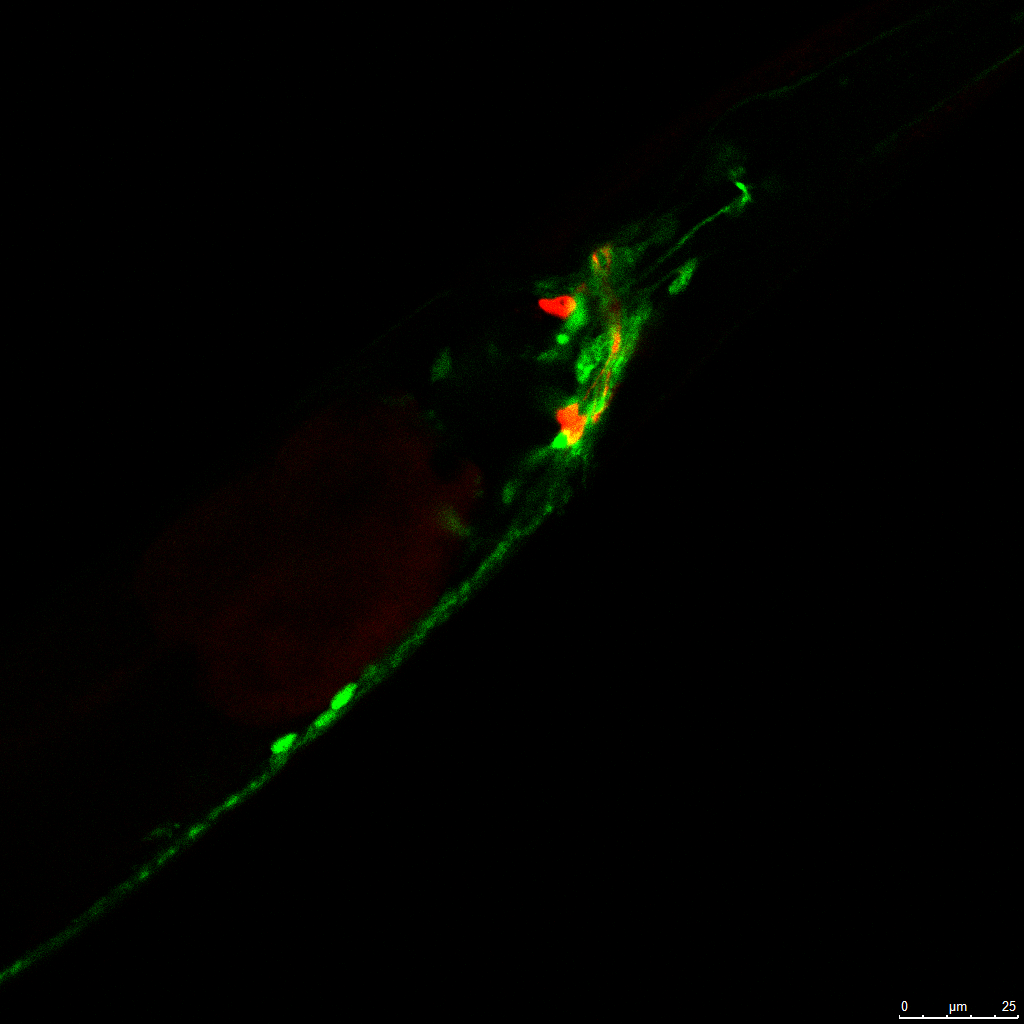


*Punc-80::GFP; PSunc-79a::mCherry*

*PSunc-79a::GFP*

D

C

**Figure S4 raw images.**

Note: each panel was cropped to generate the corresponding panel in Fig. S4.


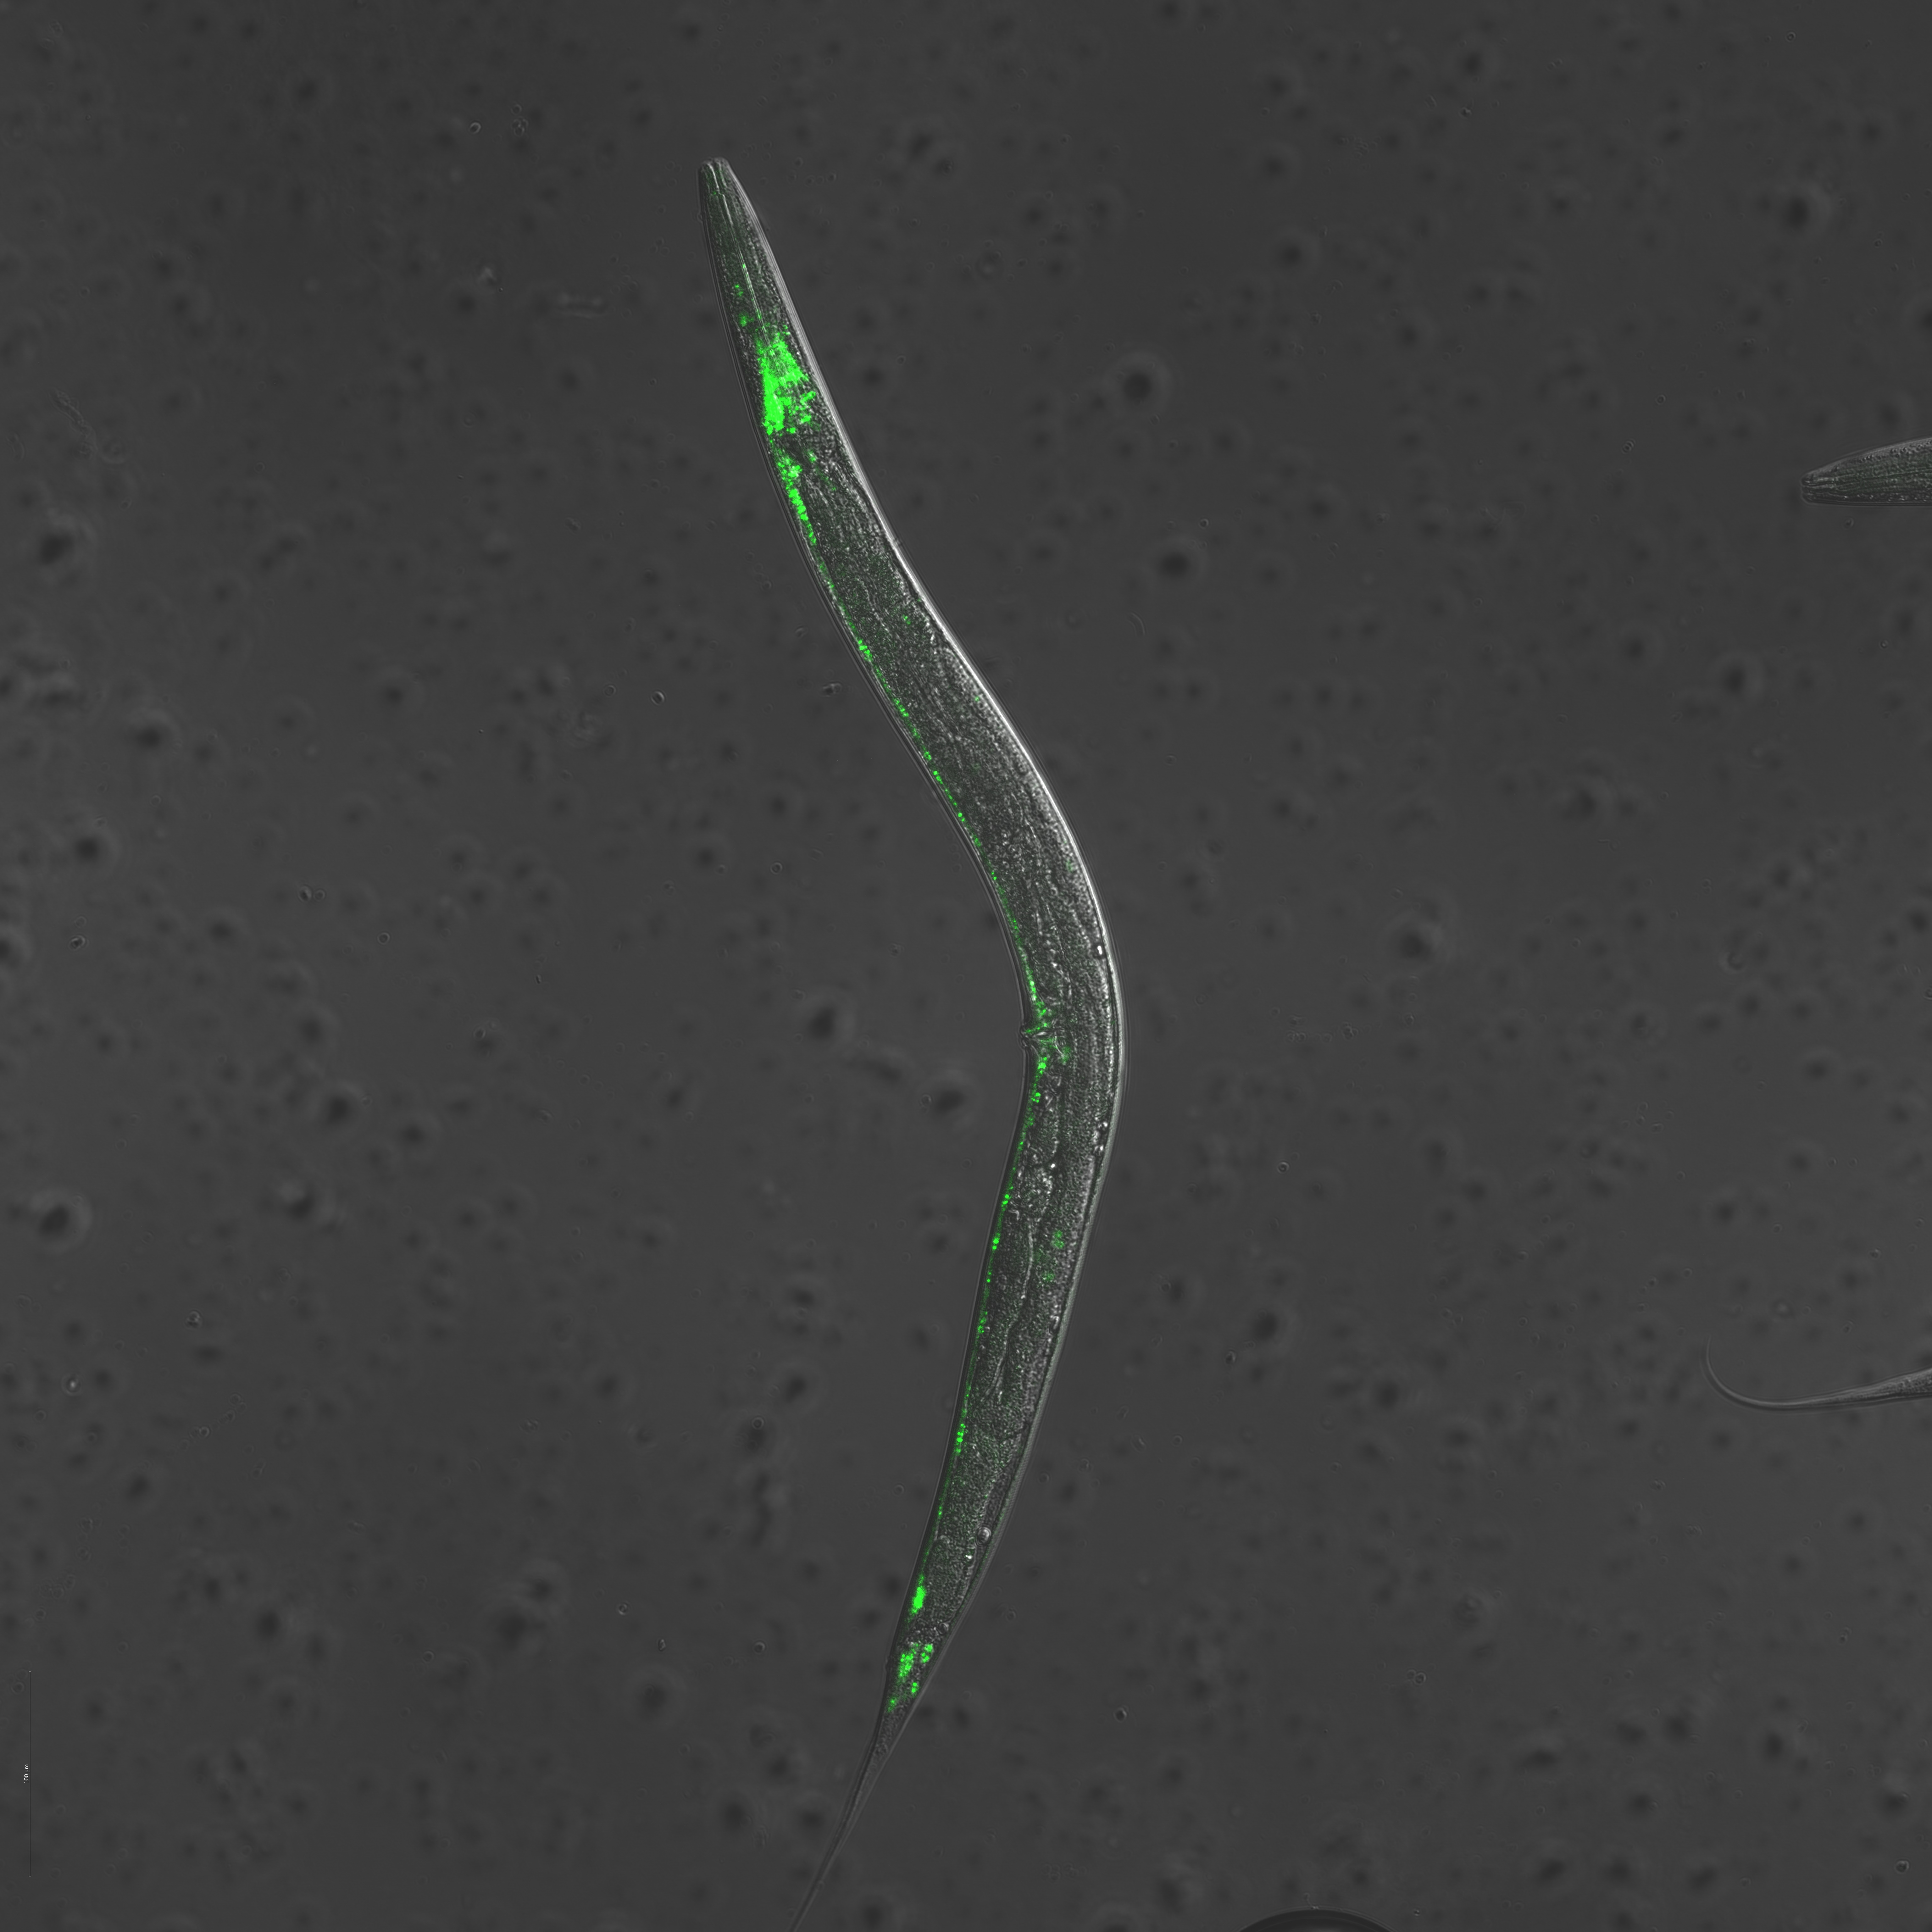

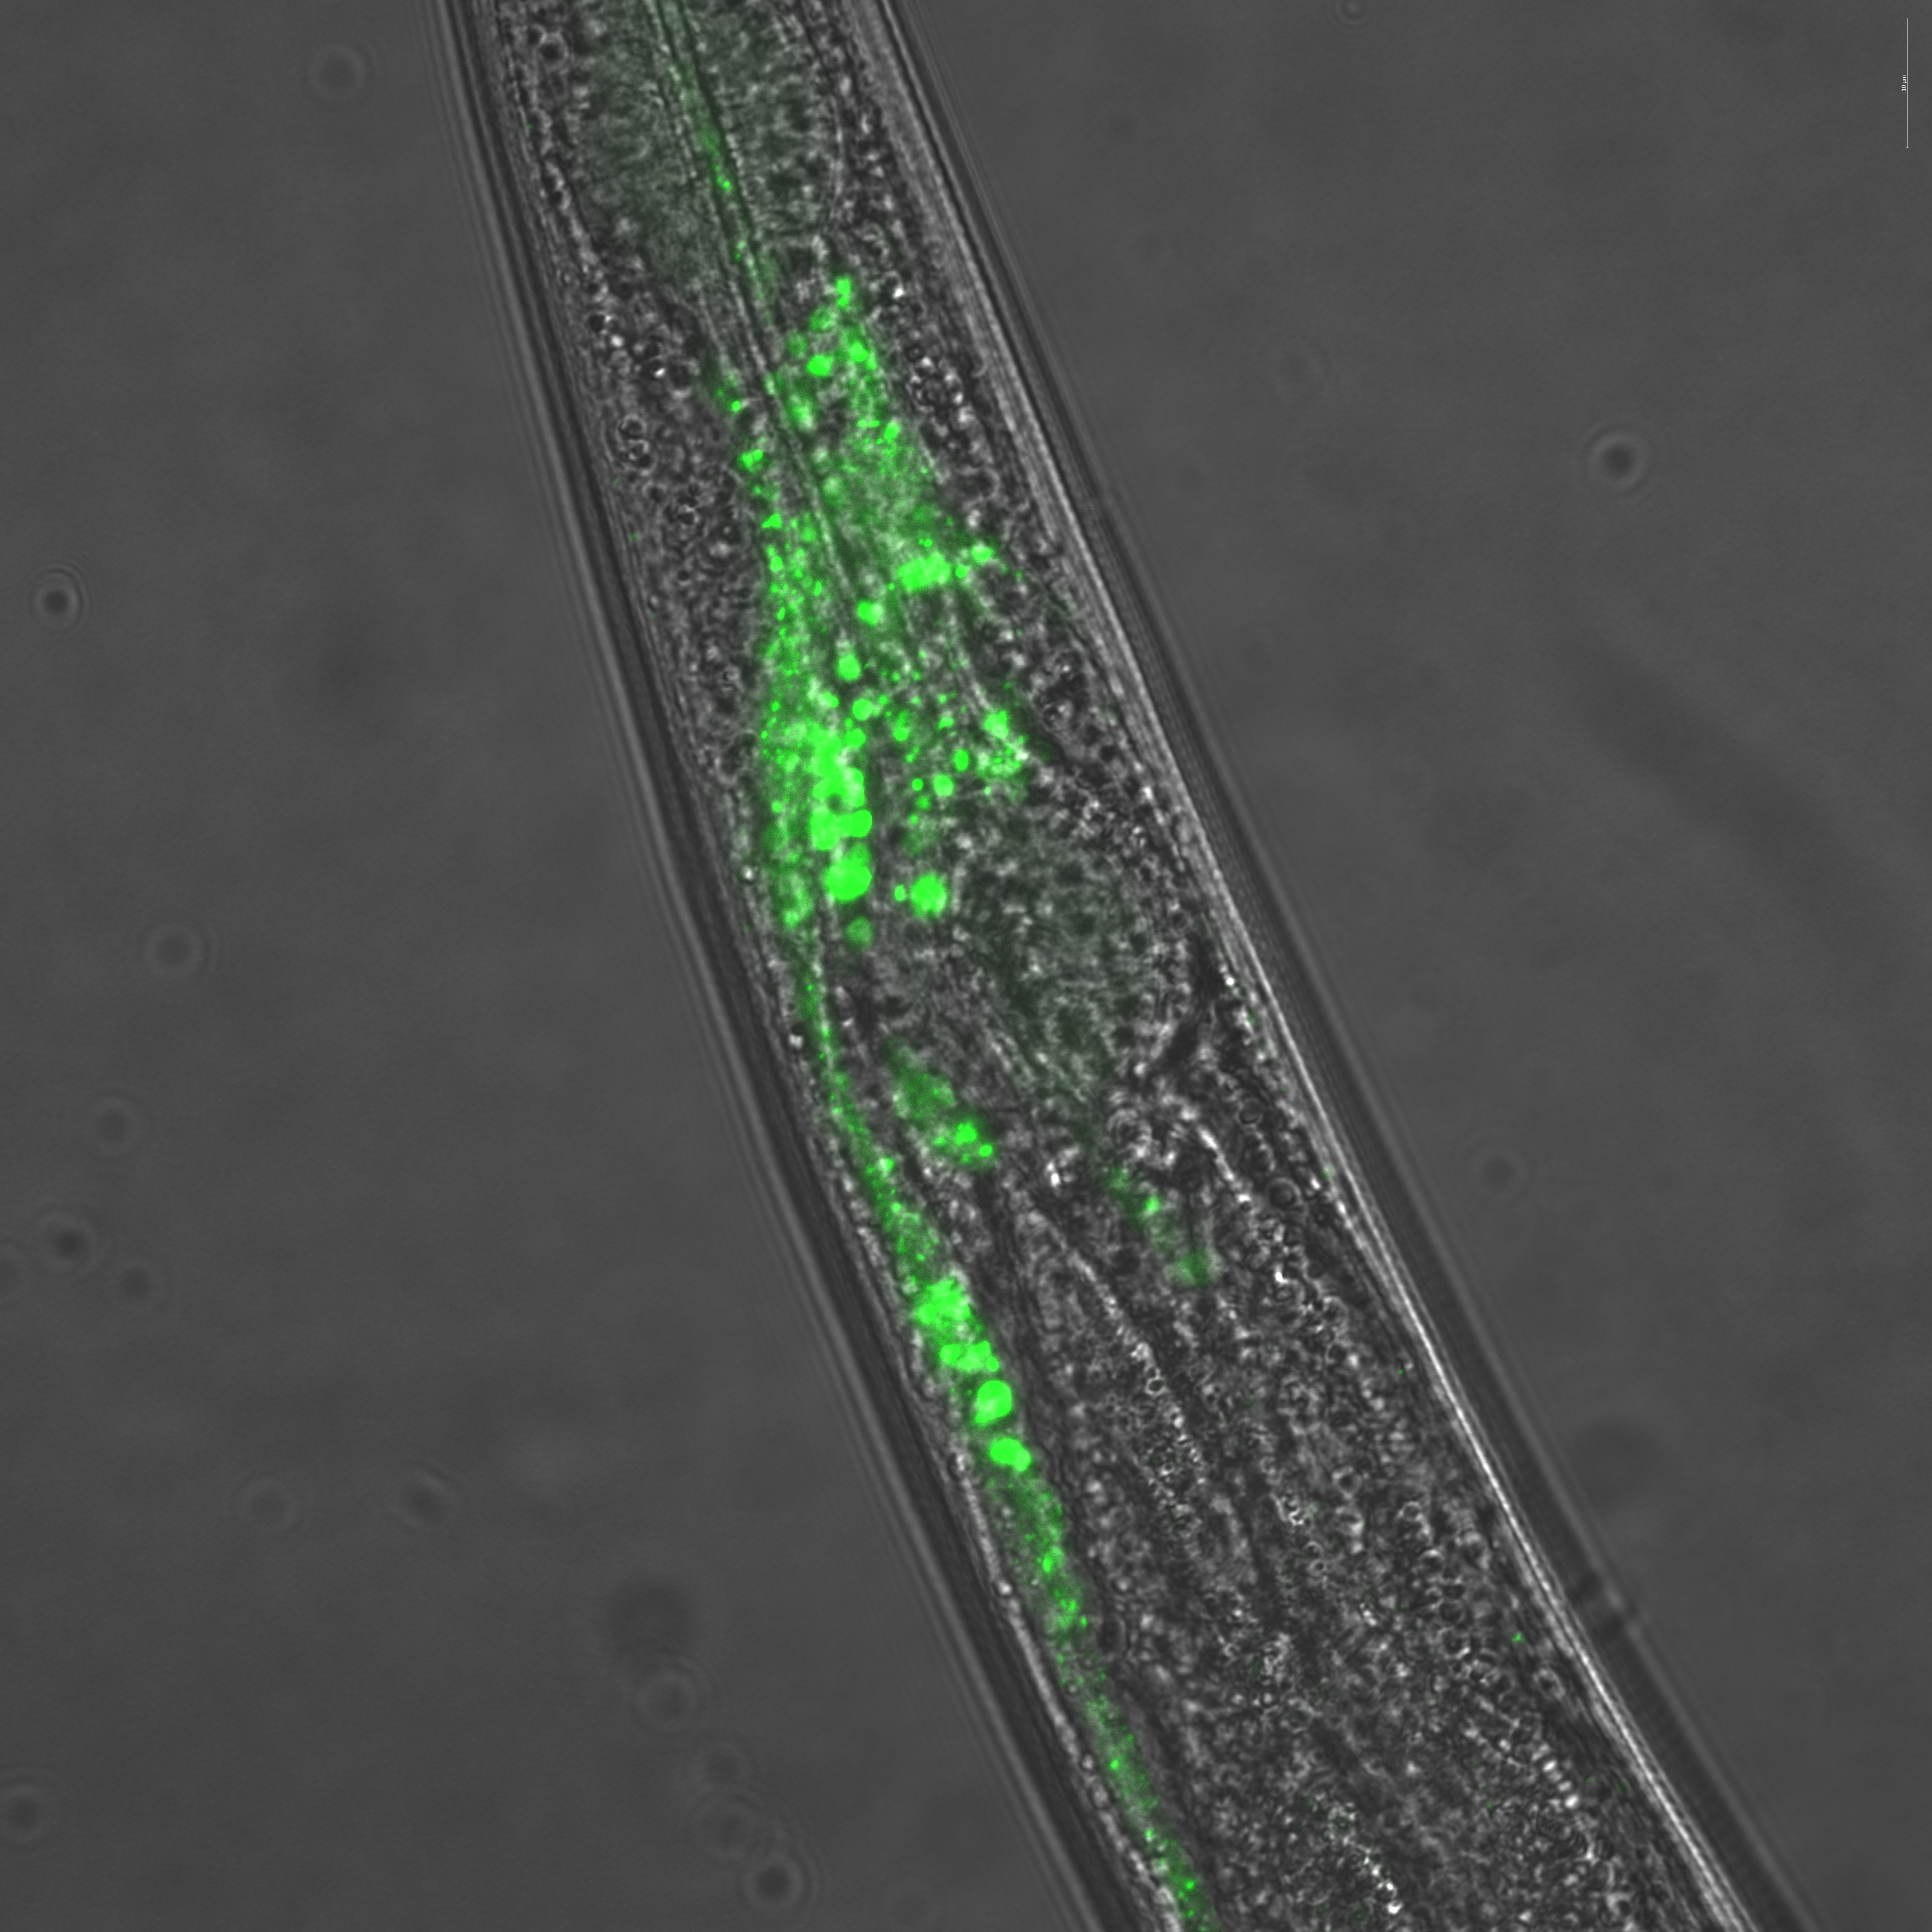


Head

*unc-79(mac383); PLunc-79a::unc-79a_cDNA::GFP*

B

A


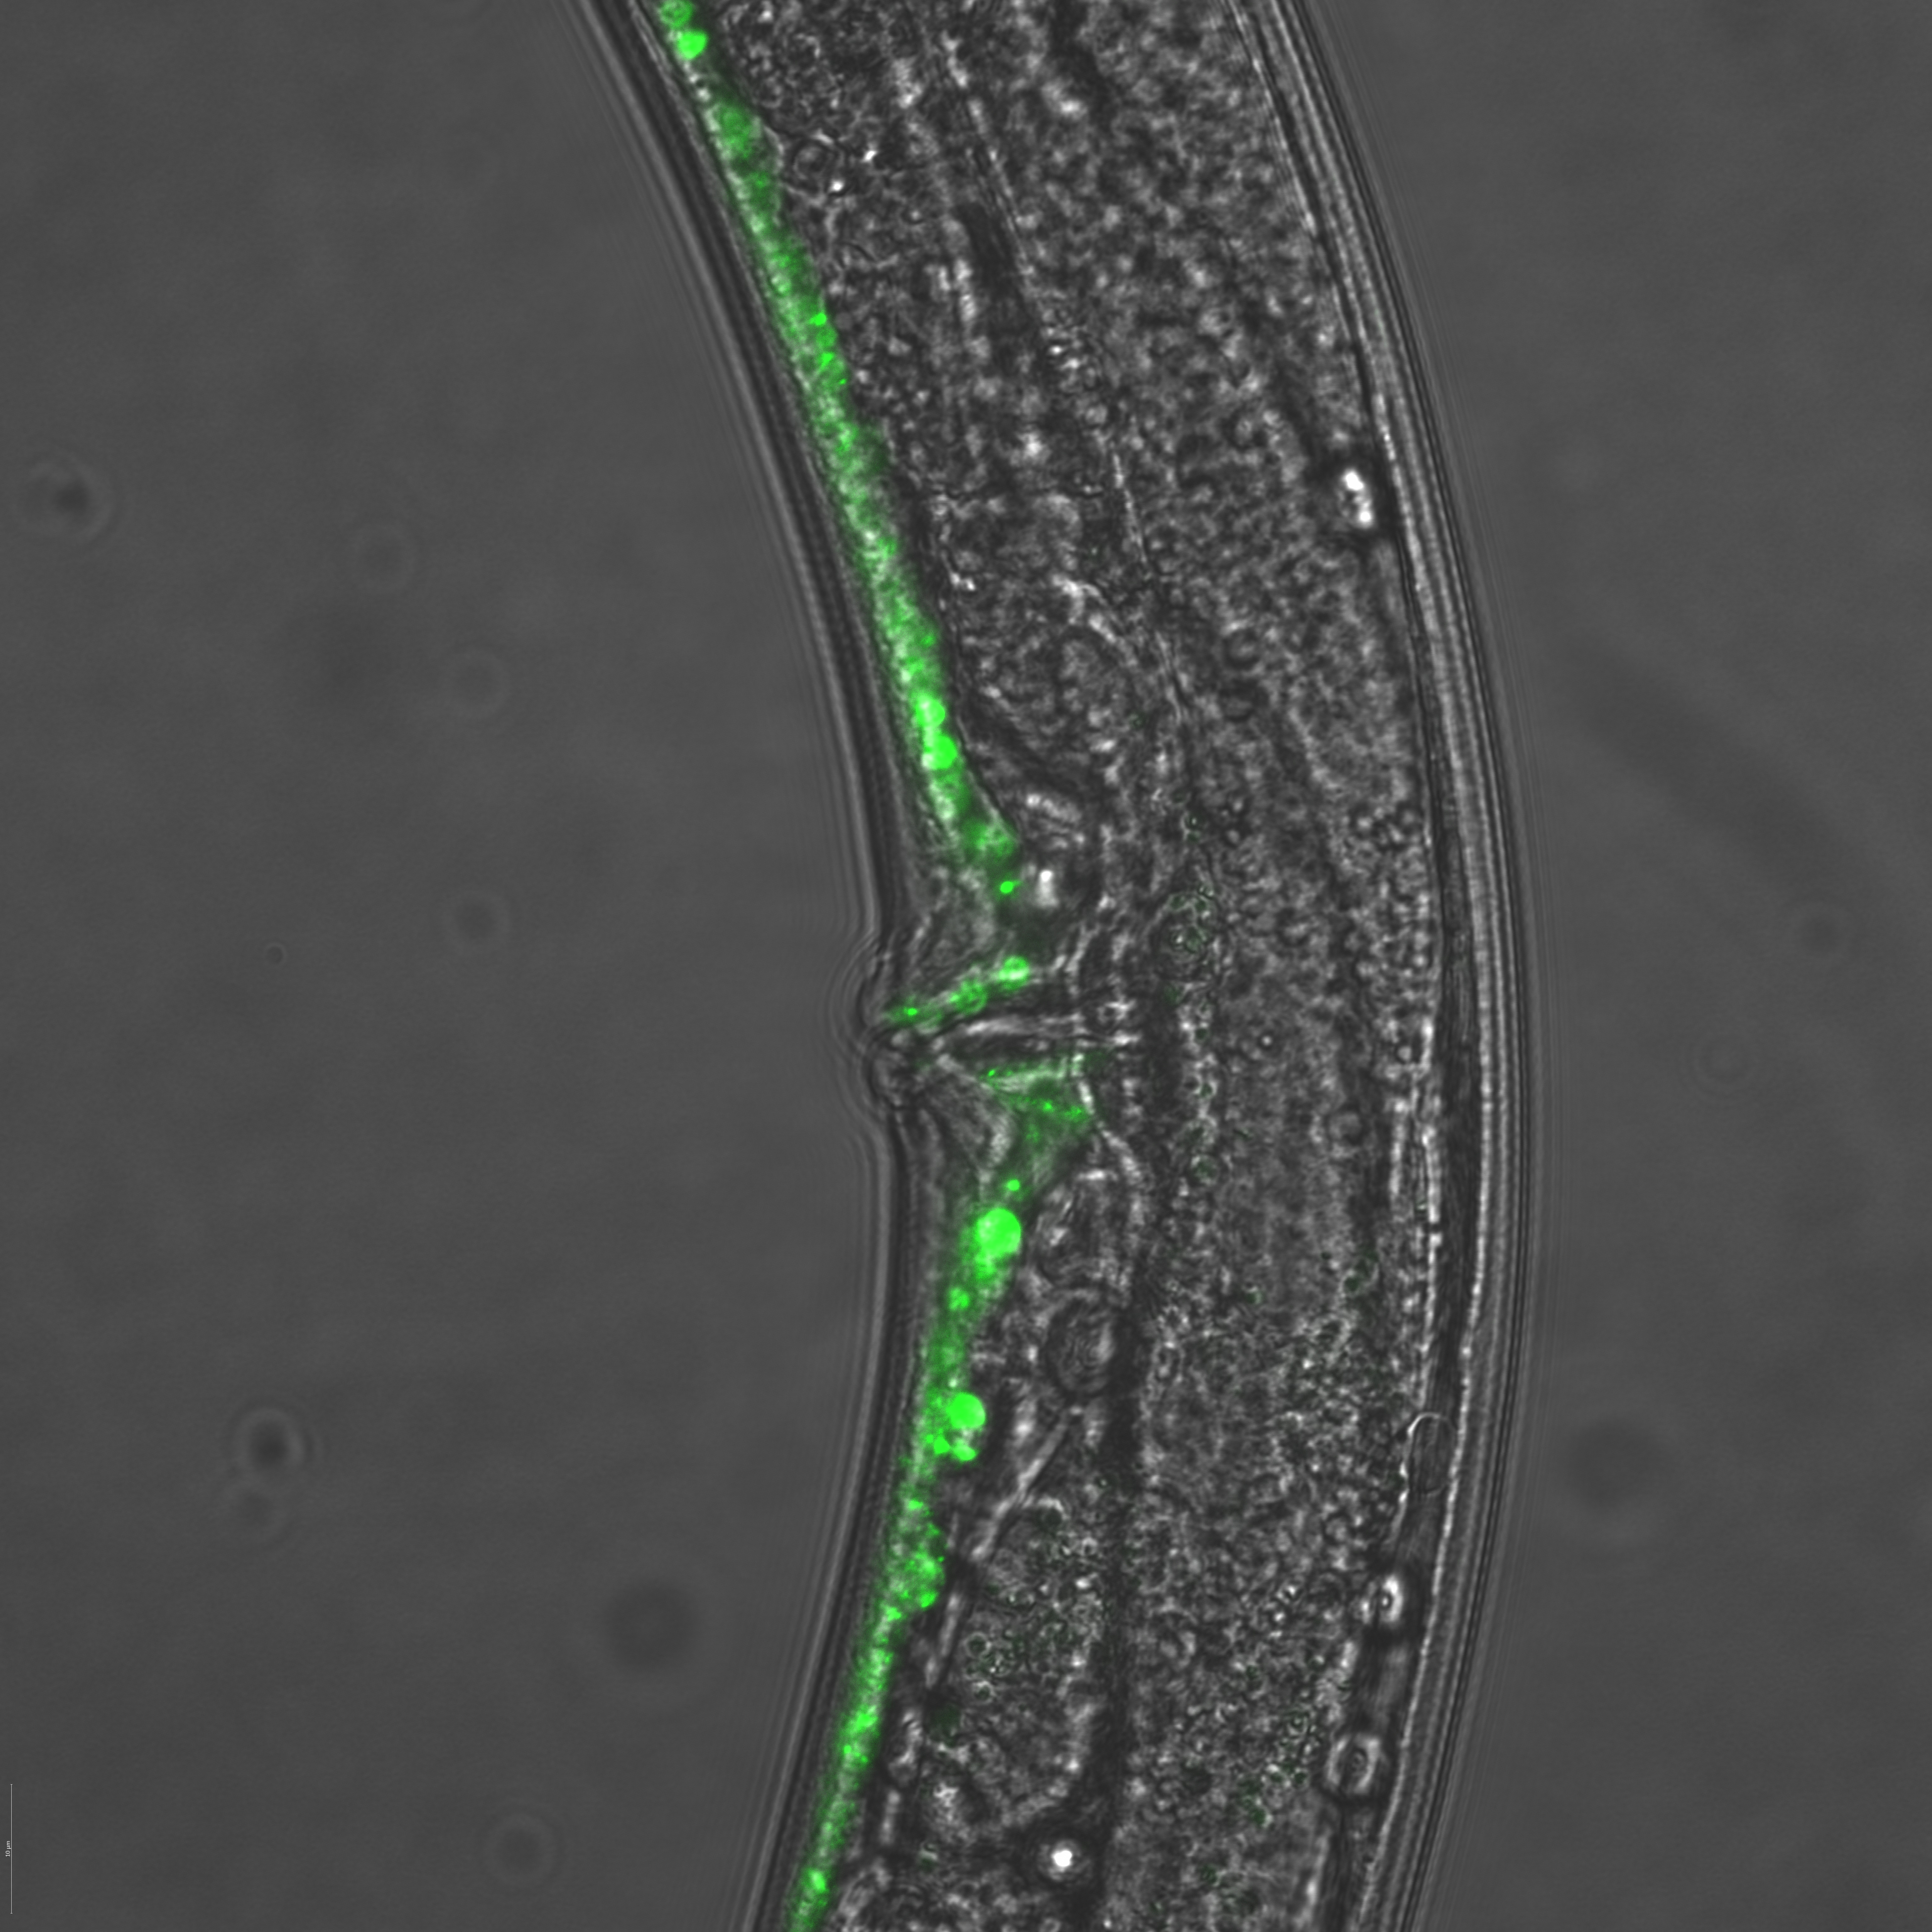

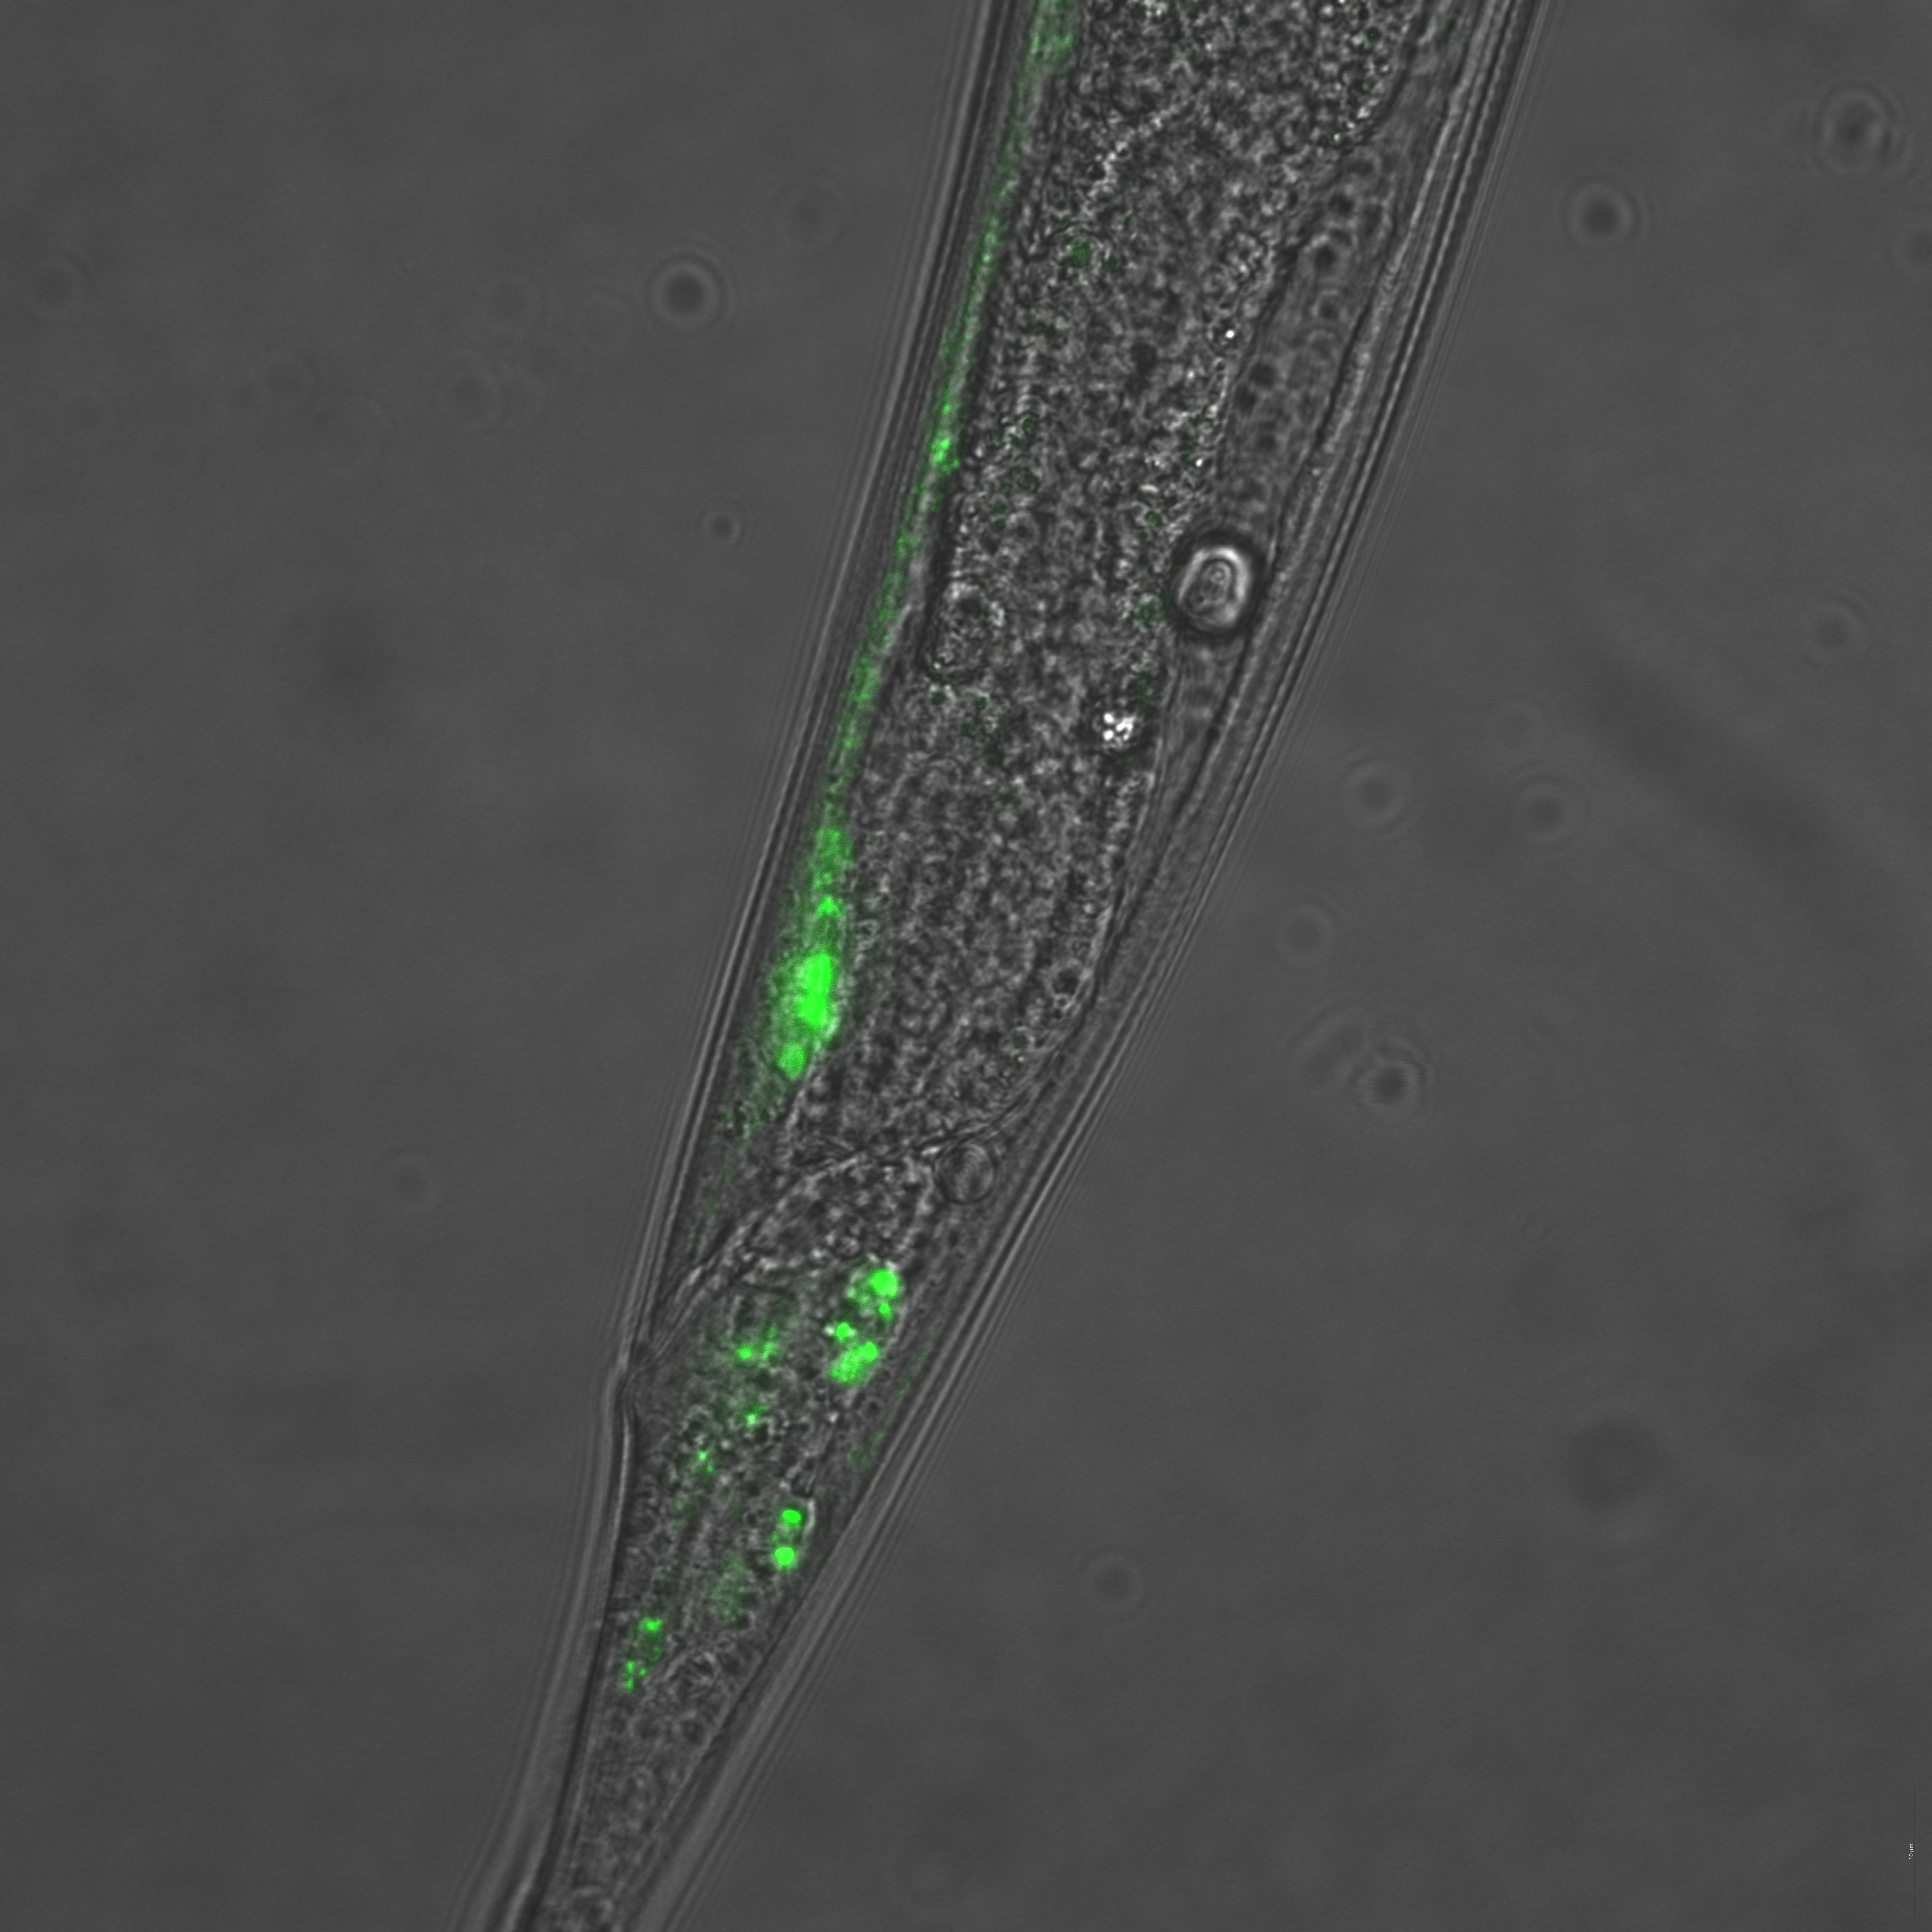


Tail

Mid body

D

C
